# Supplementary material for: Assessing the performance of MM/PBSA and MM/GBSA methods. 4. Accuracies of MM/PBSA and MM/GBSA methodologies evaluated by various simulation protocols using PDBbind data set
Source: Royal Society of Chemistry journal article supplement (doi:10.1039/c4cp01388c), 2014-01-01
Supplement: c4cp01388c1.xlsx [file c4cp01388c1.xlsx]

## Sheet: Sheet1
Table S1. Crystal structures and predicted binding free energies in this study.
PDB ID	ΔGexpa	ΔGcal-minb	ΔGcal-1nsc	SDcal-1nsd	SEcal-1nse
3e12	-8.18425	-39.1656	-43.4097	0.360618	0.0254558
2e27	-12.7677	-53.4752	-46.7041	0.419143	0.0296985
3e64	-9.7094	-48.0824	-44.7617	1.15093	0.0813173
1e66	-13.5044	-51.2772	-47.815	0.282874	0.019799
3e85	-7.34464	-26.2608	-27.8006	0.151449	0.0106066
3e92	-10.928	-66.1356	-59.4303	0.670845	0.0473762
3e93	-12.0944	-79.8376	-74.3778	0.394631	0.0275772
10gs	-8.73959	-47.9704	-47.3601	0.0747812	0.00494975
11gs	-7.95546	-61.3916	-58.212	0.946968	0.0671751
1a08	-7.67663	-56.4612	-49.5329	0.200508	0.0141421
1a1b	-8.73959	-47.0896	-43.8823	1.44377	0.101823
1a1c	-8.73959	-48.9472	-44.169	0.674332	0.0473762
1a1e	-8.196	-58.562	-60.4689	0.682326	0.0480833
1a30	-5.87521	-42.6836	-38.2036	0.327022	0.0233345
1a4k	-10.928	-49.0404	-51.9814	0.315164	0.0226274
1a4w	-8.08784	-68.2536	-62.5148	0.489498	0.0346482
1a69	-7.24121	-41.536	-43.6006	1.56762	0.111016
1a8i	-7.54425	-41.6416	-37.0987	1.78404	0.125865
1a94	-10.7284	-101.097	-108.012	2.07451	0.146371
1a99	-7.78479	-32.6364	-31.7474	0.0277103	0.00212132
1a9m	-9.4588	-85.86	-80.3238	1.42112	0.100409
1aaq	-11.4716	-73.1656	-63.5438	1.82856	0.129401
1adl	-7.31704	-42.0424	-45.7016	1.63843	0.115966
1ado	-8.196	-27.4232	-21.1167	0.395884	0.0282843
1afk	-9.04263	-39.5944	-36.8564	4.53724	0.321026
1afl	-8.58394	-28.5584	-20.1558	4.56569	0.323148
1ai4	-3.42109	-24.6288	-29.4539	0.0448081	0.00282843
1ai7	-5.58173	-19.172	-18.3021	0.0988893	0.00707107
1aid	-6.58946	-38.1288	-40.9406	1.25566	0.0890955
1aj6	-8.08784	-51.146	-47.2769	1.10089	0.0777817
1aj7	-5.28596	-49.0644	-45.0832	0.385713	0.0275772
1ajp	-3.05007	-24.7604	-25.8117	1.09054	0.0770746
1ajq	-5.88719	-26.7972	-24.6395	0.0127332	0.000707107
1ajv	-10.5441	-82.2436	-71.6263	0.820216	0.0579828
1ajx	-10.81	-75.4916	-69.7959	0.87846	0.0622254
1alw	-8.91025	-23.1092	-20.8738	0.70783	0.0502046
1amw	-6.19836	-23.2876	-27.3633	0.0235795	0.00141421
1apv	-12.294	-70.0192	-42.6555	3.17086	0.224153
1apw	-10.928	-66.1532	-52.8779	1.75856	0.124451
1ax0	-4.27184	-26.5684	-24.8202	0.543887	0.0381838
1axz	-4.36555	-20.9044	-17.2627	0.217326	0.0155563
1b05	-9.73267	-71.2952	-64.8261	0.184873	0.0127279
1b0h	-9.15079	-89.1724	-81.6488	1.1002	0.0777817
1b1h	-9.60505	-81.9684	-74.0888	1.03717	0.0735391
1b2h	-6.19836	-77.3552	-70.977	0.485349	0.0346482
1b32	-9.70184	-78.104	-72.7166	0.548305	0.0388909
1b3f	-9.40635	-79.5292	-73.8107	1.87245	0.132229
1b3g	-9.15079	-74.3828	-69.8818	0.122035	0.00848528
1b3h	-8.47959	-80.174	-75.6031	0.659143	0.046669
1b3l	-8.04035	-63.8808	-62.0017	0.222639	0.0155563
1b40	-9.93864	-79.296	-76.7599	0.000820719	0
1b46	-7.21794	-71.3048	-66.3996	0.465254	0.033234
1b4h	-7.46306	-72.2576	-67.8432	0.0590517	0.00424264
1b4z	-7.14302	-71.0684	-66.6588	0.148995	0.0106066
1b51	-10.0627	-70.2276	-65.3406	0.496262	0.0353553
1b52	-9.72481	-71.244	-69.1632	0.0220026	0.00141421
1b58	-8.99515	-81.1048	-76.9898	0.216908	0.0155563
1b5h	-8.21407	-71.5956	-66.9212	0.70161	0.0494975
1b5i	-9.6245	-72.9776	-67.4332	0.471693	0.033234
1b5j	-10.1518	-77.4772	-70.8074	1.11922	0.079196
1b6h	-10.6875	-74.364	-67.436	0.146167	0.0106066
1b6j	-10.8198	-88.29	-77.5111	1.60622	0.113844
1b6k	-11.9453	-87.6352	-82.3322	0.569747	0.0403051
1b6l	-11.3392	-74.7484	-70.8756	0.244667	0.0169706
1b6m	-11.4716	-88.6372	-80.7618	0.016364	0.00141421
1b7h	-10.9584	-76.4032	-70.7481	0.267112	0.0190919
1b9j	-8.13946	-72.21	-68.296	1.0463	0.0742462
1bai	-10.5168	-98.058	-87.6069	4.23776	0.299813
1bcu	-4.47464	-28.3668	-25.3738	0.468403	0.033234
1bdq	-8.65667	-73.5048	-66.9577	0.728904	0.0516188
1bgq	-11.7048	-42.7916	-42.2607	0.628732	0.0445477
1bhf	-5.97864	-59.1492	-56.92	0.00848898	0.000707107
1bhx	-9.34157	-59.4328	-56.1931	0.401273	0.0282843
1bju	-6.55117	-38.604	-39.2784	0.436284	0.0311127
1bjv	-7.56436	-39.314	-36.7173	0.267406	0.0190919
1bma	-6.26315	-56.2752	-53.3098	1.23979	0.0876812
1bq4	-7.13305	-30.3736	-47.5639	2.83077	0.200111
1br6	-4.40105	-41.4968	-36.1603	0.690103	0.0487904
1bv7	-12.7052	-100.15	-93.3591	1.68733	0.119501
1bv9	-13.6035	-99.1008	-77.5131	1.59286	0.11243
1bwa	-11.7504	-98.328	-64.7404	5.30405	0.374767
1bwb	-11.502	-103.229	-86.271	2.34199	0.165463
1bxo	-13.66	-64.6088	-35.6133	6.09657	0.431335
1bxq	-10.0766	-60.0916	-45.4675	6.31452	0.446184
1byk	-6.83	-46.7892	-44.473	0.971823	0.0685894
1bzc	-6.72184	-59.7276	-54.8573	1.98606	0.140714
1bzj	-6.36225	-49.744	-44.3792	0.173121	0.0120208
1c3x	-5.02385	-29.3388	-29.445	0.928178	0.0657609
1c4u	-14.1607	-68.4956	-65.4392	0.243926	0.0169706
1c4v	-14.7472	-63.936	-66.8848	0.00395458	0
1c5c	-9.50546	-49.238	-44.1114	0.534857	0.0374767
1c5n	-6.41879	-30.1676	-33.2225	0.566045	0.0403051
1c5o	-4.77397	-23.1372	-23.5433	0.417044	0.0296985
1c5q	-8.68304	-31.2484	-32.8107	0.637799	0.0452548
1c5s	-8.196	-28.1588	-25.4643	0.10858	0.00777817
1c5t	-5.59638	-29.3808	-28.8044	0.490003	0.0346482
1c5x	-9.12185	-34.0192	-33.8197	0.237323	0.0169706
1c5y	-5.7381	-30.7416	-31.3519	0.0330674	0.00212132
1c5z	-5.48207	-24.6824	-24.7683	0.153823	0.0106066
1c70	-14.0712	-93.648	-81.1629	2.8154	0.199404
1c83	-6.63039	-36.124	-33.6126	0.260985	0.0183848
1c84	-6.83596	-40.4076	-33.0147	0.044947	0.00282843
1c86	-6.41879	-39.7948	-37.6833	0.260862	0.0183848
1c87	-5.7381	-36.7308	-34.5618	1.45896	0.103238
1c88	-7.22946	-39.5596	-35.7579	0.406429	0.0289914
1ce5	-6.46826	-22.8368	-23.7013	0.359228	0.0254558
1cea	-6.77346	-28.5864	-27.5005	0.222381	0.0155563
1ceb	-8.196	-24.608	-23.2152	0.251419	0.0176777
1cet	-3.94235	-29.5508	-27.4047	0.31346	0.0219203
1ct8	-8.91025	-64.6276	-65.9482	1.07214	0.0756604
1d3d	-12.419	-70.9392	-67.428	0.422	0.0296985
1d3p	-10.0909	-65.2296	-58.137	3.52102	0.248902
1d4h	-13.66	-95.064	-79.0578	1.2539	0.0883883
1d4i	-12.0944	-97.2604	-79.2373	1.89219	0.133643
1d4j	-11.415	-93.136	-86.2685	0.820745	0.0579828
1d4k	-12.597	-88.4452	-87.1086	0.42787	0.0304056
1d4l	-11.9792	-84.498	-82.2847	0.743209	0.0523259
1d4p	-8.60721	-52.1568	-50.7809	0.252819	0.0176777
1d4y	-15.1584	-85.5088	-72.5572	1.93954	0.137179
1d6v	-8.43358	-42.2824	-39.4503	2.33139	0.164756
1d6w	-8.13946	-68.0236	-62.4312	0.00025501	0
1d7i	-4.92041	-19.2868	-15.7593	0.395969	0.0282843
1d7j	-4.50921	-16.7844	-12.9616	0.14287	0.00989949
1d9i	-12.4414	-57.284	-56.6777	0.672124	0.0473762
1db1	-12.6487	-74.816	-69.113	0.724161	0.0509117
1det	-5.87521	-25.7556	-22.6807	0.452246	0.0318198
1df8	-13.2488	-46.2732	-40.0434	0.0040659	0
1dfo	-9.15079	-58.306	-54.5579	0.825349	0.0586899
1dhi	-9.91666	-47.0832	-45.6321	0.191581	0.013435
1dhj	-8.94907	-48.6164	-44.9033	0.276178	0.019799
1dif	-14.5583	-103.769	-93.2672	1.24564	0.0883883
1dl7	-8.87197	-29.3712	-25.8646	3.49844	0.247487
1dmp	-13.0492	-81.768	-66.5645	0.888806	0.0629325
1dqx	-15.0885	-44.4356	-44.1199	0.691869	0.0487904
1drj	-10.1056	-28.144	-27.3272	0.0324066	0.00212132
1drk	-9.32146	-26.4716	-27.7586	0.320484	0.0226274
1drv	-8.93036	-77.8644	-72.2127	0.01987	0.00141421
1dud	-6.58946	-31.2416	-20.8188	0.248813	0.0176777
1duv	-16.1132	-73.0748	-60.5921	1.73289	0.122329
1dy4	-5.95104	-46.2044	-42.8926	0.379055	0.0268701
1dzk	-8.32838	-28.948	-28.8921	0.0768449	0.00565685
1e1v	-6.72184	-41.6068	-39.0623	0.537673	0.0381838
1e1x	-8.04035	-43.516	-39.1605	0.352502	0.0247487
1e2k	-6.75227	-44.8572	-41.7517	0.722576	0.0509117
1e2l	-5.85767	-45.2656	-39.4484	1.15243	0.0813173
1e3v	-5.92804	-36.2248	-30.9506	0.762632	0.0537401
1e4h	-11.4866	-35.9444	-32.1744	0.235144	0.0169706
1e5j	-5.464	-52.7852	-48.2878	2.08201	0.147078
1eb2	-8.20799	-55.1228	-49.0802	1.79463	0.126572
1ebw	-12.3565	-93.7952	-74.5193	3.54066	0.250316
1eby	-13.2488	-96.3904	-83.9086	0.236948	0.0169706
1ebz	-12.8376	-91.672	-82.2022	0.30359	0.0212132
1ec0	-11.604	-99.7288	-84.6353	3.13414	0.221324
1ec1	-12.1858	-101.645	-89.1499	0.79203	0.0558614
1ec2	-13.66	-99.182	-93.6239	0.843804	0.059397
1ec3	-12.3435	-99.4956	-93.5042	1.88969	0.133643
1ecv	-6.63039	-39.222	-34.0182	0.315094	0.0226274
1efy	-11.231	-35.68	-39.164	1.20218	0.0848528
1egh	-7.78479	-17.642	-19.2128	0.3775	0.0268701
1eix	-15.1018	-50.5648	-47.7549	0.871705	0.0615183
1ejn	-7.67663	-57.6876	-50.273	0.218513	0.0155563
1ela	-8.68304	-48.8372	-44.0203	0.190408	0.013435
1elb	-9.7736	-38.408	-39.6059	0.544909	0.0381838
1elc	-9.09425	-49.9988	-44.01	0.605152	0.0431335
1eld	-9.15079	-47.8896	-43.6481	0.487349	0.0346482
1ele	-9.36239	-48.8296	-43.0841	0.569345	0.0403051
1elr	-6.77346	-59.5836	-51.9669	0.893581	0.0629325
1ent	-9.50546	-66.8108	-53.0262	0.110893	0.00777817
1erb	-11.0604	-61.0816	-59.3084	1.46471	0.103238
1ez9	-6.96238	-53.5932	-52.2265	0.199183	0.0141421
1ezq	-12.3565	-68.6672	-61.9883	1.15598	0.0820244
1f0r	-10.4603	-59.2624	-48.7942	0.202507	0.0141421
1f0s	-10.5793	-51.7252	-50.0411	0.77697	0.0551543
1f0t	-8.196	-41.342	-42.2857	1.18679	0.0841457
1f0u	-9.78213	-52.9044	-54.6849	0.737675	0.0523259
1f4e	-4.04146	-20.3484	-16.8103	0.320517	0.0226274
1f4f	-6.31063	-31.936	-28.7278	0.00342108	0
1f4g	-8.85371	-47.8416	-41.318	0.964789	0.0678823
1f4x	-7.62915	-34.7356	-34.6967	0.597548	0.0424264
1f5k	-5.1153	-23.474	-23.8453	0.0207414	0.00141421
1f5l	-7.20664	-33.2164	-29.8881	1.15667	0.0820244
1fao	-10.0627	-50.516	-45.6972	0.410056	0.0289914
1fch	-9.7736	-75.8668	-66.9546	0.0176004	0.00141421
1fcx	-9.82676	-70.6316	-65.8398	0.209912	0.0148492
1fcy	-11.6423	-72.168	-64.9851	0.427021	0.0304056
1fcz	-12.597	-68.5704	-63.5887	0.173873	0.0120208
1fd0	-11.4716	-71.5232	-66.9277	0.0132801	0.000707107
1fdq	-9.93418	-50.7704	-46.3165	0.0627684	0.00424264
1fh7	-7.15316	-36.014	-33.6203	1.00424	0.0707107
1fh8	-9.40635	-35.9064	-37.1705	0.87959	0.0622254
1fh9	-8.78584	-39.4684	-32.5451	1.38305	0.0975807
1fhd	-9.32146	-41.6208	-28.2399	2.22665	0.157685
1fiv	-8.99515	-111.34	-100.167	0.169028	0.0120208
1fj4	-6.26315	-39.3088	-37.3819	0.537003	0.0381838
1fjs	-13.6035	-57.6616	-58.1528	0.0451188	0.00353553
1fkb	-13.2488	-65.7248	-56.7209	0.341285	0.0240416
1fkg	-10.928	-50.3728	-45.1424	0.855637	0.0608112
1fkh	-11.1396	-41.116	-39.6843	0.257741	0.0183848
1fki	-9.562	-46.77	-36.0091	1.94561	0.137886
1fkn	-12.0152	-94.9672	-87.5883	1.33951	0.0947523
1fl3	-9.28317	-52.3448	-52.4158	0.25995	0.0183848
1flr	-13.66	-50.072	-45.108	0.44771	0.0318198
1fm9	-12.294	-83.7816	-78.8337	1.23462	0.0869741
1fpc	-9.562	-62.6012	-55.1566	0.524687	0.0367696
1fq5	-11.4716	-102.435	-99.1324	0.984626	0.0692965
1fv0	-8.09781	-46.574	-37.1178	0.135137	0.00989949
1fzk	-11.4716	-96.414	-87.3681	0.281245	0.019799
1fzo	-10.7724	-94.292	-86.4916	0.291011	0.0205061
1fzq	-10.4086	-55.9564	-50.9618	0.236815	0.0169706
1g2k	-10.8715	-88.166	-80.183	2.57156	0.181726
1g2l	-9.89547	-65.5208	-59.0862	0.496859	0.0353553
1g2o	-14.4152	-47.1004	-50.2108	1.18486	0.0834386
1g30	-9.36239	-57.754	-58.36	1.31936	0.0933381
1g32	-8.3434	-57.7904	-52.8271	0.155044	0.0113137
1g35	-11.1147	-93.3708	-80.8771	2.0921	0.147785
1g36	-9.79958	-51.382	-48.8227	2.86932	0.20294
1g3d	-7.58518	-29.5968	-30.1323	1.40802	0.0997021
1g3e	-7.34464	-30.9964	-32.778	0.0741791	0.00494975
1g74	-8.91025	-49.1216	-43.0266	0.308971	0.0219203
1g7g	-9.01841	-64.798	-57.3967	3.89656	0.275772
1g7q	-8.27386	-78.438	-73.2368	0.0116566	0.000707107
1g7v	-8.73959	-36.8224	-43.9674	2.52065	0.178191
1g85	-7.48771	-28.6316	-28.245	0.6052	0.0431335
1g98	-7.78479	-39.4748	-40.9926	1.76052	0.124451
1g9r	-7.78479	-77.1652	-61.0172	2.70684	0.191626
1gaf	-10.928	-47.8872	-43.6589	0.302848	0.0212132
1gai	-10.928	-74.48	-66.716	1.89145	0.133643
1gar	-13.66	-71.36	-60.22	1.28623	0.0912168
1gcz	-7.00863	-41.4956	-34.0466	0.328415	0.0233345
1ghv	-5.93771	-37.2672	-37.7164	0.312208	0.0219203
1ghw	-5.7381	-37.6264	-35.0387	0.418092	0.0296985
1gi1	-7.47	-36.0028	-32.1141	0.202662	0.0141421
1gi7	-6.1588	-37.3596	-34.5097	0.233918	0.0162635
1gj6	-9.562	-46.2496	-43.2616	0.336266	0.0240416
1gj7	-10.7724	-46.7652	-40.5751	0.895896	0.0636396
1gj8	-9.50546	-45.2592	-42.3568	0.51522	0.0367696
1gja	-7.40402	-40.3744	-35.6503	1.21702	0.086267
1gjb	-8.66971	-40.07	-40.042	0.220789	0.0155563
1gjc	-8.66971	-38.8468	-40.3564	0.156646	0.0113137
1gjd	-7.13305	-45.1296	-47.2335	0.378781	0.0268701
1gni	-11.0244	-49.5512	-47.4723	0.914741	0.0643467
1gnm	-8.53998	-79.7208	-75.5928	1.16896	0.0827315
1gnn	-7.75585	-74.8632	-72.1581	1.03941	0.0735391
1gno	-10.5168	-70.684	-71.3819	0.211184	0.0148492
1gpk	-7.33068	-43.2132	-40.4583	0.0784491	0.00565685
1gpn	-8.84656	-47.5848	-46.2137	0.382159	0.0268701
1gt1	-8.196	-34.8116	-32.2457	0.040469	0.00282843
1gt3	-8.8188	-36.2036	-34.4169	0.198214	0.0141421
1gt4	-8.91025	-35.7572	-35.3101	0.0285885	0.00212132
1gt5	-8.32838	-31.2456	-31.2277	0.156184	0.0113137
1gu1	-6.17825	-26.2348	-20.9943	0.385998	0.0275772
1gvw	-9.50546	-62.2984	-47.4664	10.0779	0.712764
1gvx	-9.86505	-97.896	-90.7916	2.50635	0.177484
1gwv	-3.51317	-38.0076	-36.5131	0.0686775	0.00494975
1gyx	-3.38971	-21.9844	-16.3931	0.970911	0.0685894
1gyy	-4.96988	-25.3912	-23.2587	0.341737	0.0240416
1gz3	-5.05279	-47.3868	-26.5704	0.953895	0.0671751
1gz4	-5.05279	-50.9888	-11.7148	1.66952	0.118087
1gz9	-4.7928	-38.6532	-28.6949	1.38839	0.0982878
1gzc	-4.77397	-27.3996	-23.4613	0.397496	0.0282843
1h0a	-7.43609	-51.1772	-49.0211	1.99236	0.140714
1h1p	-6.72184	-43.5632	-38.974	0.244092	0.0169706
1h1s	-11.231	-56.4492	-53.1391	0.177866	0.0127279
1h22	-12.4264	-76.372	-69.8801	0.00078839	0
1h23	-11.4017	-79.3136	-74.9202	0.35911	0.0254558
1h2t	-10.7724	-80.258	-74.2287	0.815167	0.0579828
1h46	-4.87476	-40.7912	-26.8345	2.568	0.181726
1h4w	-6.36225	-27.7852	-24.1386	0.240653	0.0169706
1h5v	-5.37086	-59.8232	-56.7686	0.311965	0.0219203
1h6h	-7.24121	-44.826	-40.2121	0.128453	0.00919239
1h9z	-7.40402	-40.4948	-43.4417	0.667149	0.0473762
1ha2	-7.56436	-40.654	-42.9337	0.757172	0.0537401
1hbv	-8.69668	-77.1564	-74.2136	0.157841	0.0113137
1hi3	-5.72876	-34.5904	-37.8317	0.246951	0.0176777
1hi4	-6.13997	-37.2712	-35.7276	2.54884	0.180312
1hi5	-5.51347	-40.0128	-32.8473	3.81348	0.269408
1hih	-10.9905	-82.6308	-73.085	0.160685	0.0113137
1hii	-9.93864	-86.324	-73.558	0.016139	0.00141421
1hk4	-7.25319	-52.9348	-48.7361	2.22643	0.157685
1hmr	-8.95118	-52.0864	-45.0221	0.802814	0.0565685
1hms	-8.69668	-50.2392	-43.5735	0.468712	0.033234
1hmt	-7.90252	-52.3112	-45.9532	0.427516	0.0304056
1hn2	-8.196	-32.3108	-30.5577	0.625884	0.0445477
1hnn	-8.51916	-39.4212	-34.564	0.405582	0.0289914
1hos	-11.6832	-79.704	-80.3192	0.0674515	0.00494975
1hp0	-9.15079	-38.246	-33.8116	0.783219	0.0551543
1hpo	-12.597	-66.9568	-60.3125	2.24764	0.159099
1hps	-12.597	-84.8104	-81.4102	0.078187	0.00565685
1hpv	-12.597	-75.9232	-65.9667	0.527262	0.0374767
1hpx	-15.3807	-80.4964	-70.3525	0.724084	0.0509117
1hqg	-4.098	-27.066	-21.5682	1.3528	0.0954594
1hsh	-12.868	-90.2256	-77.868	2.40794	0.170413
1hvh	-10.8715	-70.206	-63.1402	2.70538	0.191626
1hvi	-14.9178	-98.976	-88.4572	1.19098	0.0841457
1hvj	-15.5696	-96.1888	-87.3429	0.583828	0.0410122
1hvk	-14.9695	-99.4652	-89.0063	0.230476	0.0162635
1hvl	-13.5928	-92.9516	-91.1624	0.707583	0.0502046
1hvr	-12.9888	-89.5396	-79.9423	1.21963	0.086267
1hvs	-14.0712	-93.3284	-85.2509	2.39767	0.169706
1hwr	-11.3759	-56.1012	-44.7641	3.03885	0.21496
1hxb	-13.5518	-85.57	-77.8315	0.872796	0.0615183
1hxw	-14.7855	-91.1776	-85.6144	0.781986	0.0551543
1i00	-8.65667	-35.5668	-34.3686	0.833736	0.0586899
1i5r	-11.6423	-105.012	-99.143	0.67574	0.0480833
1i7z	-8.73959	-50.8844	-48.6957	0.0659058	0.00494975
1i80	-8.75461	-24.8308	-24.6762	0.40556	0.0289914
1i8i	-10.4603	-75.996	-71.9695	0.144067	0.00989949
1icj	-3.03505	-56.4428	-49.0942	0.711952	0.0502046
1igj	-13.66	-52.044	-46.8882	1.09424	0.0770746
1ii5	-9.04263	-28.1696	-24.803	1.07307	0.0756604
1iih	-3.94235	-29.1364	-14.3155	2.88154	0.203647
1iiq	-10.2197	-98.4524	-88.5761	0.586578	0.0417193
1ik4	-10.1206	-29.7252	-28.0345	0.865117	0.0615183
1ikt	-4.64159	-59.8732	-55.1432	0.0524638	0.00353553
1is0	-9.562	-67.3148	-59.2246	0.0750549	0.00565685
1izh	-10.5168	-98.25	-85.2847	0.143681	0.00989949
1izi	-8.99515	-93.1296	-81.2836	0.26727	0.0190919
1j01	-8.836	-37.7152	-28.5789	1.33472	0.0940452
1j14	-6.13627	-27.7788	-26.2305	0.3075	0.0219203
1j16	-5.25181	-28.9844	-26.5569	0.160282	0.0113137
1j17	-7.12812	-64.94	-57.6024	0.227063	0.0162635
1j4r	-10.5472	-62.7456	-55.2223	0.292862	0.0205061
1jak	-7.60676	-40.482	-34.4163	1.0344	0.072832
1jet	-9.90598	-68.9588	-61.4253	0.464799	0.0325269
1jeu	-9.32146	-73.144	-69.6916	0.340156	0.0240416
1jev	-9.40635	-87.1696	-80.9887	0.77287	0.0544472
1jfh	-2.7945	-37.632	-31.222	1.20651	0.0855599
1jgl	-11.8828	-46.5088	-41.5014	0.00975928	0.000707107
1jlr	-4.55226	-56.754	-54.7906	3.25434	0.22981
1jmf	-7.88121	-40.9236	-26.3143	1.90341	0.13435
1jmg	-8.29241	-37.7216	-34.7949	0.127319	0.00919239
1jmi	-8.27862	-42.1596	-34.4351	3.52264	0.248902
1jn4	-6.75749	-65.4524	-56.9537	2.0126	0.142128
1jq8	-8.1901	-55.7032	-42.7086	0.895775	0.0636396
1jqd	-7.05013	-52.732	-49.4032	0.765031	0.0544472
1jqe	-8.80209	-60.3048	-52.68	3.312	0.234052
1jqy	-6.72184	-50.8116	-45.9493	0.897862	0.0636396
1jsv	-7.78479	-37.5248	-33.3689	0.775404	0.0551543
1jwt	-10.7284	-62.6572	-60.5014	1.38482	0.0975807
1jyq	-11.8828	-78.4048	-71.08	3.06809	0.217082
1jys	-4.81225	-22.2128	-21.6114	0.21725	0.0155563
1k1i	-8.98609	-48.1788	-47.6358	1.08003	0.0763675
1k1j	-10.3172	-53.0272	-52.4204	0.456292	0.0325269
1k1l	-9.42962	-45.6052	-41.4723	0.14007	0.00989949
1k1m	-10.1056	-50.0236	-43.4919	0.0183792	0.00141421
1k1n	-9.30971	-54.7448	-54.3905	1.097	0.0777817
1k1y	-4.40105	-75.2796	-75.4633	1.37678	0.0975807
1k21	-11.4426	-55.928	-53.5071	0.730672	0.0516188
1k22	-11.4716	-59.5404	-55.5453	0.0319126	0.00212132
1k27	-12.294	-55.8744	-51.0085	0.420445	0.0296985
1k9s	-8.91025	-55.0608	-52.7476	0.0769927	0.00565685
1kav	-7.95546	-55.5444	-49.3953	0.20737	0.0148492
1kdk	-12.3565	-56.3472	-52.1294	0.344272	0.0240416
1kel	-9.94994	-53.4808	-50.3051	0.224753	0.0155563
1kjr	-8.27184	-40.514	-41.5914	0.0305106	0.00212132
1koj	-9.15079	-39.9148	-45.7505	0.135104	0.00989949
1kpm	-7.92089	-57.5084	-51.3055	0.11072	0.00777817
1ksn	-12.8376	-66.28	-58.4998	0.921599	0.0650538
1kv1	-8.10795	-53.19	-49.7698	0.810266	0.0572756
1kv5	-5.76705	-18.0836	-17.8314	0.538683	0.0381838
1kyv	-8.08784	-58.7816	-53.0388	1.12508	0.0799031
1kzk	-14.1889	-88.6648	-75.7027	0.441942	0.0311127
1kzn	-12.1858	-64.7812	-57.3645	1.28184	0.0905097
1l2s	-6.26315	-35.3712	-34.161	0.580462	0.0410122
1l83	-4.64159	-18.3444	-16.531	0.174274	0.0120208
1laf	-10.7284	-46.9836	-37.6207	0.124516	0.00848528
1lag	-8.60721	-31.8712	-29.1782	0.110678	0.00777817
1lah	-10.2763	-35.2008	-30.7812	0.82429	0.0579828
1lbf	-10.7284	-53.2196	-52.0837	1.0033	0.0707107
1lbk	-4.33736	-32.8072	-33.4969	0.0298024	0.00212132
1lee	-10.5793	-69.6604	-60.7002	0.0995931	0.00707107
1lf2	-10.2763	-68.9676	-52.9583	5.03804	0.356382
1lgw	-5.464	-21.5876	-19.5839	0.217741	0.0155563
1li2	-5.51995	-20.5424	-18.34	0.109963	0.00777817
1li3	-5.80798	-23.9088	-20.6042	0.277502	0.019799
1li6	-5.18517	-18.8348	-17.3949	0.0328823	0.00212132
1lke	-10.2723	-63.9364	-62.2228	0.775734	0.0551543
1lkk	-9.36239	-64.9456	-59.2673	0.949937	0.0671751
1lkl	-7.93985	-57.0004	-55.6017	0.97731	0.0692965
1lnm	-11.8828	-60.6048	-58.6382	0.652916	0.0459619
1lol	-8.72494	-29.2488	-25.9033	0.151338	0.0106066
1loq	-5.05279	-35.4856	-38.2335	0.718455	0.0509117
1lor	-15.1018	-45.2872	-41.7455	0.0450284	0.00353553
1lpg	-9.67973	-73.2296	-63.6468	0.372743	0.026163
1lpk	-10.3172	-59.4972	-55.5958	0.290098	0.0205061
1lpz	-10.3844	-61.73	-51.5332	1.33865	0.0947523
1lrt	-7.70188	-51.6464	-76.2189	1.67916	0.118794
1lst	-10.7284	-38.9692	-32.6092	0.4548	0.0318198
1lyb	-15.6	-74.144	-87.6763	4.53144	0.320319
1lyx	-6.19836	-16.1336	-12.9121	0.122069	0.00848528
1lzq	-11.4569	-97.1412	-78.2443	0.232694	0.0162635
1m0b	-12.0417	-90.2648	-77.65	0.221838	0.0155563
1m13	-10.3388	-73.166	-71.9248	0.231567	0.0162635
1m2p	-8.3434	-37.4956	-35.4745	0.0450234	0.00353553
1m2q	-8.32838	-40.3372	-40.8249	0.525074	0.0374767
1m2r	-8.8188	-40.9952	-37.9649	0.0532384	0.00353553
1m48	-6.94773	-52.2212	-44.8777	0.736918	0.0523259
1m4h	-13.0083	-99.3072	-93.9797	0.688588	0.0487904
1m5w	-5.82955	-18.4384	-11.157	2.86759	0.20294
1m6p	-6.96238	-24.0412	-16.596	0.247493	0.0176777
1m7d	-8.50902	-57.3648	-49.629	2.16746	0.153442
1m7i	-7.37359	-76.9812	-71.7165	2.16943	0.153442
1m7y	-14.9695	-71.54	-64.2521	0.166822	0.0120208
1mai	-9.12185	-42.664	-42.3407	1.43286	0.101116
1me7	-9.81756	-45.8948	-43.6562	0.421713	0.0296985
1me8	-9.81756	-45.3	-55.1795	0.851532	0.0601041
1mes	-10.5168	-77.6532	-61.4357	0.500224	0.0353553
1met	-12.8376	-77.5408	-68.7284	1.59999	0.113137
1mfa	-6.88595	-39.6468	-37.4999	0.225547	0.0162635
1mfd	-7.25319	-40.6988	-41.3419	0.00400592	0
1mfi	-7.62915	-35.0768	-33.1705	0.26749	0.0190919
1mh5	-12.5872	-60.5136	-58.5122	0.860047	0.0608112
1mhw	-10.0357	-72.0856	-72.4334	3.58217	0.253144
1mj7	-11.4017	-56.7168	-51.2233	0.805778	0.0572756
1mjj	-11.9355	-62.0004	-53.4714	0.115219	0.00848528
1moq	-4.7208	-42.7912	-42.4096	0.462687	0.0325269
1mq5	-12.294	-68.6304	-61.2725	0.292602	0.0205061
1mq6	-15.2376	-70.9932	-65.0133	0.444524	0.0311127
1mrw	-13.2488	-78.958	-61.7768	1.2896	0.0912168
1mrx	-9.91666	-74.8576	-58.4599	3.38095	0.239002
1msm	-14.3177	-87.6836	-76.6503	0.377204	0.0268701
1msn	-12.419	-81.8192	-72.022	1.82453	0.128693
1mtr	-11.4716	-84.0948	-79.1646	1.44587	0.10253
1mu6	-11.4426	-56.298	-54.2411	0.463819	0.0325269
1mu8	-12.294	-57.5708	-56.7705	0.461352	0.0325269
1mue	-11.7999	-59.1668	-50.9419	0.965879	0.0685894
1n0s	-10.1814	-42.452	-40.6922	0.175854	0.0127279
1n1m	-7.78479	-36.3236	-34.4234	0.723096	0.0509117
1n1t	-5.26439	-41.3072	-31.8478	0.126479	0.00919239
1n3i	-12.1384	-50.576	-49.7319	0.471511	0.033234
1n46	-14.3743	-64.422	-58.3126	1.6427	0.115966
1n4h	-8.95118	-53.196	-47.4831	0.351999	0.0247487
1n4k	-13.7225	-50.8264	-57.625	0.719301	0.0509117
1n51	-6.63039	-75.4524	-68.6696	1.11485	0.0784889
1n5r	-7.72825	-41.736	-41.147	0.486031	0.0346482
1n8v	-8.23905	-38.7608	-37.4915	0.809156	0.0572756
1nc1	-8.36667	-56.564	-52.3622	0.332906	0.0233345
1nc3	-6.83	-51.11	-46.4618	1.83857	0.130108
1nf8	-10.6875	-35.7652	-31.9913	0.528061	0.0374767
1nfu	-10.5793	-59.792	-56.4335	0.536712	0.0381838
1nfw	-12.2375	-53.0364	-43.2084	0.443975	0.0311127
1nfx	-11.6423	-62.8996	-52.3788	0.00814005	0.000707107
1nfy	-12.1384	-60.9668	-52.2169	1.79197	0.126572
1nh0	-13.3113	-96.722	-77.942	2.69555	0.190919
1nhu	-7.72825	-39.7664	-37.645	0.823659	0.0579828
1nja	-8.61919	-40.2824	-37.808	0.866672	0.0615183
1njc	-7.58518	-38.7936	-39.5453	3.04402	0.21496
1njd	-7.60676	-39.888	-36.3893	2.14888	0.152028
1nje	-5.18517	-37.96	-38.3295	0.344008	0.0240416
1njs	-10.6875	-68.5124	-64.3491	0.54478	0.0381838
1nki	-9.15079	-0.7856	-2.30146	0.181267	0.0127279
1nl9	-8.13946	-63.0652	-57.2036	0.0245826	0.00141421
1nli	-4.89715	-26.3916	-23.2254	0.229239	0.0162635
1nm6	-13.7225	-62.4732	-59.0737	1.8201	0.128693
1nny	-10.4603	-83.538	-76.6186	0.0469731	0.00353553
1no6	-6.02261	-41.72	-39.3139	0.165626	0.0120208
1nq7	-9.28317	-58.4036	-54.8849	0.0786665	0.00565685
1nt1	-12.1384	-65.2504	-63.9764	0.331443	0.0233345
1nu3	-5.464	-26.1172	-22.807	1.09501	0.0777817
1nvq	-11.272	-67.38	-61.6525	0.598803	0.0424264
1nvr	-11.0754	-63.6308	-61.3199	0.214632	0.0148492
1nvs	-10.6875	-54.9908	-52.0271	0.184386	0.0127279
1nw4	-12.3835	-44.4216	-41.972	1.53813	0.108894
1nw5	-7.12324	-61.8048	-58.3823	1.09969	0.0777817
1nw7	-6.95501	-45.6576	-42.8341	0.292463	0.0205061
1nz7	-9.72481	-73.52	-68.8605	0.765027	0.0544472
1o0f	-7.24121	-27.754	-29.6755	1.37578	0.0975807
1o0h	-8.08784	-37.3444	-33.2093	0.335266	0.0240416
1o0m	-7.03318	-36.5116	-30.4481	0.00858411	0.000707107
1o0n	-5.58173	-33.2028	-35.447	0.479891	0.0339411
1o2h	-9.79079	-41.9096	-39.8983	1.1184	0.079196
1o2j	-9.45384	-38.8828	-33.0216	1.96724	0.1393
1o2n	-8.32101	-42.6712	-43.1654	1.25951	0.0890955
1o2o	-8.68304	-42.798	-39.6873	1.18799	0.0841457
1o2q	-10.4878	-51.6136	-42.8873	0.637874	0.0452548
1o2s	-7.47	-32.1756	-31.1552	0.0888859	0.00636396
1o2w	-7.99639	-37.0764	-38.6216	2.42067	0.17112
1o2x	-7.99639	-38.84	-37.8156	1.66137	0.11738
1o2z	-8.3434	-42.2168	-41.5614	0.21265	0.0148492
1o30	-9.24721	-44.72	-40.4758	0.913702	0.0643467
1o33	-7.8473	-30.9036	-31.1382	0.713649	0.0502046
1o36	-8.13946	-53.2576	-48.4645	0.00736805	0.000707107
1o38	-9.32146	-40.1452	-37.228	1.17598	0.0834386
1o3d	-9.74063	-42.5176	-38.0455	0.18428	0.0127279
1o3f	-10.8715	-40.4956	-38.9968	0.644412	0.0452548
1o3h	-9.97321	-38.7764	-35.4639	0.535331	0.0381838
1o3i	-9.97321	-39.6704	-36.0871	0.190634	0.013435
1o3j	-9.24721	-37.1368	-32.9712	0.476472	0.0339411
1o3k	-9.24721	-38.0888	-31.811	1.70894	0.120915
1o3p	-9.09425	-45.4752	-45.2586	0.317553	0.0226274
1o5a	-8.77002	-44.086	-41.6578	0.0168185	0.00141421
1o5b	-7.88121	-31.8412	-32.5395	0.0493595	0.00353553
1o5c	-7.13305	-43.2924	-41.8887	3.22057	0.227688
1o5e	-7.8473	-53.6912	-51.1594	1.22703	0.0869741
1o5g	-6.77346	-50.5828	-50.6851	0.239418	0.0169706
1o7o	-6.13997	-44.998	-42.6374	0.654814	0.0459619
1o8b	-3.65785	-26.8476	-24.455	0.226467	0.0162635
1o9d	-7.65241	-56.3404	-50.0682	0.609599	0.0431335
1oar	-10.1056	-43.134	-41.4986	0.640005	0.0452548
1oau	-10.5168	-34.9404	-27.5135	2.26685	0.160513
1oba	-3.33809	-15.6788	-18.2804	0.756319	0.0537401
1obx	-7.81522	-42.5312	-41.9373	2.75169	0.194454
1ocq	-7.08556	-42.9552	-37.3387	1.25666	0.0890955
1od8	-6.96238	-38.422	-34.123	0.884884	0.0622254
1odi	-5.74759	-47.8824	-40.8416	1.61924	0.114551
1odj	-5.59638	-49.5564	-43.9344	1.81432	0.127986
1ody	-11.0604	-99.7968	-86.4213	3.09134	0.218496
1oe8	-7.54425	-31.1288	-30.1444	0.61511	0.0438406
1ofz	-6.30816	-20.8392	-20.0998	0.168547	0.0120208
1ogd	-4.14105	-24.8516	-24.3351	0.192225	0.013435
1ogg	-7.09476	-69.0632	-68.2495	0.288454	0.0205061
1ogx	-8.32101	-30.2976	-34.1125	0.628144	0.0445477
1ogz	-7.99639	-29.588	-27.8999	0.0557545	0.00424264
1ohr	-11.8828	-78.1256	-71.531	0.528825	0.0374767
1oif	-10.5472	-28.4984	-27.3764	0.0970835	0.00707107
1oko	-6.19836	-20.4476	-18.6142	0.641086	0.0452548
1ols	-7.9476	-55.826	-59.8774	1.36756	0.0968736
1olx	-5.91065	-64.1136	-64.4528	1.79393	0.126572
1om1	-9.24721	-48.11	-43.6774	0.233545	0.0162635
1ony	-9.24721	-65.0756	-58.0131	0.37984	0.0268701
1onz	-6.96238	-42.4148	-43.4935	0.348202	0.0247487
1os5	-9.36239	-47.2772	-39.4964	0.19022	0.013435
1oss	-6.53652	-26.3092	-24.3563	0.222697	0.0155563
1ow4	-7.75585	-37.9124	-38.6554	0.541057	0.0381838
1owe	-8.46916	-38.6792	-39.4286	0.0400816	0.00282843
1owh	-10.1056	-42.4956	-38.8633	0.0073544	0.000707107
1oxr	-7.09476	-16.8076	-16.7284	0.843773	0.059397
1oyt	-9.89547	-51.0628	-49.8254	1.58948	0.11243
1oz0	-10.5168	-84.8668	-91.5046	0.754915	0.053033
1p19	-5.6206	-36.494	-30.9075	0.415569	0.0296985
1p1n	-9.28317	-39.2316	-34.5083	1.45879	0.103238
1p1o	-7.86741	-35.4644	-34.5133	0.66675	0.0473762
1p57	-6.00759	-38.5164	-33.0897	0.0557502	0.00424264
1pa9	-6.28641	-47.438	-40.9523	1.419	0.100409
1pb8	-7.0399	-25.6792	-24.5282	0.0567961	0.00424264
1pb9	-4.94216	-20.8156	-20.1688	0.255802	0.0183848
1pbq	-8.56155	-34.5768	-31.7902	0.55689	0.039598
1pdz	-5.05279	-4.7716	-5.7405	0.0693814	0.00494975
1pgp	-7.78479	-36.4944	-49.2944	0.125918	0.00919239
1phw	-4.50921	-22.7328	-34.7493	1.0613	0.0749533
1pkx	-9.45384	-58.8324	-57.4577	0.682045	0.0480833
1pme	-12.8376	-49.6732	-49.4222	1.15004	0.0813173
1pot	-7.50597	-47.312	-43.0278	0.159439	0.0113137
1ppc	-8.41613	-50.8188	-48.3251	0.0599002	0.00424264
1pph	-8.08784	-45.5508	-38.7634	0.630825	0.0445477
1ppi	-6.84807	-93.048	-87.4425	0.808125	0.0572756
1ppk	-10.4603	-53.3712	-43.5906	2.7966	0.19799
1ppl	-11.6832	-59.4112	-48.4004	4.62387	0.326683
1ppm	-7.91717	-55.7728	-39.4576	3.83211	0.270822
1pr1	-7.24121	-40.5952	-35.0988	0.876287	0.0622254
1pr5	-5.35584	-41.2868	-34.7081	0.653278	0.0459619
1pro	-15.4372	-80.3988	-76.6595	0.503821	0.0353553
1pu7	-4.23038	-30.3068	-25.6764	0.0883126	0.00636396
1pu8	-4.23038	-23.7848	-21.6004	0.475592	0.0339411
1pvn	-13.4195	-53.5604	-56.1038	0.792728	0.0558614
1pxn	-9.7736	-50.7732	-45.4102	0.430084	0.0304056
1pxo	-11.8828	-50.4552	-48.8814	0.680639	0.0480833
1pxp	-9.09425	-53.6224	-49.3539	1.77124	0.125158
1pye	-8.76072	-45.6232	-39.1268	2.98119	0.210718
1pyn	-7.50597	-69.4852	-61.0514	0.161805	0.0113137
1pz5	-7.37359	-75.6332	-61.0542	0.901247	0.0636396
1pzi	-5.76705	-38.2088	-35.4663	0.618946	0.0438406
1pzo	-4.53342	-38.6068	-33.5032	0.226115	0.0162635
1pzp	-4.52119	-36.16	-32.3928	1.66238	0.11738
1q1g	-11.7048	-48.5184	-46.6423	1.01733	0.0721249
1q5k	-10.136	-43.9648	-43.0848	0.282788	0.019799
1q72	-9.36239	-40.0816	-35.9409	0.763036	0.0537401
1q7a	-9.82676	-38.258	-47.3362	1.31254	0.092631
1q84	-15.0951	-97.702	-90.1849	1.208	0.0855599
1q8t	-6.49801	-43.0756	-39.3918	0.397445	0.0282843
1q8u	-8.13946	-48.5368	-42.5935	0.755747	0.0537401
1q8w	-7.16347	-42.7352	-41.2841	1.2998	0.0919239
1qan	-6.12171	-61.4396	-55.8045	1.06055	0.0749533
1qaw	-7.00067	-32.026	-33.6979	0.0289466	0.00212132
1qb1	-9.24721	-50.678	-47.7682	1.05794	0.0749533
1qb6	-8.27862	-43.3656	-42.3092	0.8169	0.0579828
1qb9	-10.1681	-52.0532	-49.1009	1.57397	0.111016
1qbn	-7.99639	-47.6268	-46.6456	0.383519	0.0268701
1qbo	-10.5793	-55.6464	-47.5811	0.284574	0.019799
1qbr	-14.4368	-95.106	-79.9223	3.81536	0.270115
1qbs	-12.934	-76.0148	-63.361	2.57578	0.182434
1qbt	-14.5066	-106.277	-95.7441	1.4881	0.105359
1qbu	-13.9832	-78.7848	-69.0168	0.560016	0.039598
1qbv	-7.35894	-53.7724	-45.7123	1.0461	0.0742462
1qca	-7.19555	-50.574	-50.5233	0.157592	0.0113137
1qft	-11.9792	-29.4424	-26.6805	0.52851	0.0374767
1qhc	-10.3388	-74.4936	-55.8995	0.82933	0.0586899
1qi0	-3.20571	-29.2448	-22.8157	0.252457	0.0176777
1qiw	-10.5793	-71.6624	-84.0639	2.29762	0.162635
1qka	-8.08784	-89.906	-80.4166	1.20403	0.0848528
1qkb	-10.0357	-71.2356	-66.9313	0.122092	0.00848528
1qkt	-12.3435	-43.1892	-42.6764	0.00327447	0
1ql7	-6.83	-59.0492	-51.9478	0.479015	0.0339411
1ql9	-7.31034	-64.4964	-54.447	3.125	0.221324
1qxk	-6.8925	-67.1668	-60.4582	0.153566	0.0106066
1qy1	-8.91025	-30.946	-28.0398	0.419539	0.0296985
1qy2	-7.8473	-26.8548	-24.8846	0.00503952	0.000707107
1qy5	-9.15079	-36.6516	-38.155	0.991696	0.0700036
1r0p	-10.928	-65.6916	-59.7082	0.485069	0.0346482
1r4w	-5.5265	-39.2612	-39.9805	0.350045	0.0247487
1r6n	-10.1056	-40.2368	-38.7661	2.00894	0.142128
1r9l	-7.37359	-26.1956	-24.069	0.124485	0.00848528
1rbp	-9.18122	-54.4132	-49.5457	0.129445	0.00919239
1rd4	-10.5695	-54.2924	-53.7776	1.22879	0.0869741
1rdt	-9.15079	-58.9952	-60.0936	0.713821	0.0502046
1re8	-13.0083	-74.588	-67.7573	0.0743912	0.00494975
1rej	-11.3392	-59.96	-55.6562	0.696556	0.0494975
1rek	-9.15079	-85.1444	-80.3148	0.0119864	0.000707107
1rnt	-7.08556	-30.9808	-20.7811	2.05159	0.144957
1ro7	-4.34721	-87.016	-85.3795	0.753891	0.053033
1rr6	-14.004	-44.9572	-42.9904	0.361106	0.0254558
1s5z	-4.38159	-46.2104	-44.0059	1.36696	0.0968736
1s89	-7.15316	-21.5988	-22.4766	0.0399673	0.00282843
1sb1	-9.41555	-63.4756	-61.9199	1.83381	0.129401
1sbg	-10.5793	-75.5848	-70.414	0.389691	0.0275772
1sdt	-12.6596	-86.4644	-79.2011	0.182366	0.0127279
1sdu	-13.7495	-82.97	-78.6795	0.158632	0.0113137
1sdv	-11.942	-83.4872	-77.6284	0.0712749	0.00494975
1sgu	-7.33972	-77.4468	-78.2102	1.39782	0.0989949
1sh9	-8.23778	-80.028	-72.7159	1.73757	0.123037
1siv	-11.0314	-75.9076	-70.4424	0.376264	0.0268701
1sl3	-16.1924	-68.2076	-66.1802	0.886144	0.0629325
1sld	-8.97276	-61.7604	-61.4614	1.71579	0.121622
1slg	-5.33162	-64.588	-58.8239	0.527188	0.0374767
1sqa	-12.5776	-51.6944	-48.0674	1.36354	0.0961665
1sqn	-12.8376	-58.8272	-52.3012	0.253275	0.0176777
1sqo	-10.1848	-43.3132	-39.0336	0.188355	0.013435
1sqt	-8.4701	-42.9864	-42.3483	1.72473	0.121622
1sr7	-13.7924	-83.314	-77.7554	0.306718	0.0219203
1srg	-7.24121	-44.2892	-30.5976	1.16476	0.0820244
1stc	-11.0604	-69.8332	-69.3397	0.276797	0.019799
1str	-6.51521	-56.8108	-60.9015	0.303677	0.0212132
1sts	-6.83	-60.8984	-66.7407	0.984112	0.0692965
1sv3	-5.93771	-18.4312	-18.6874	0.369613	0.026163
1sw2	-9.86505	-27.3024	-24.6796	0.765547	0.0544472
1swg	-10.0504	-37.76	-31.5185	2.3141	0.163342
1swr	-9.45384	-45.9568	-37.9404	0.444125	0.0311127
1syh	-8.75006	-48.1276	-44.4476	0.108499	0.00777817
1t31	-11.7999	-59.2256	-60.7827	0.967375	0.0685894
1t32	-10.136	-65.1276	-64.2143	0.249357	0.0176777
1t4v	-10.4878	-57.0616	-52.9415	0.691124	0.0487904
1t5f	-5.76705	-27.1324	-20.9659	1.31554	0.0933381
1t7d	-8.23271	-52.6572	-46.387	1.17592	0.0834386
1t7j	-11.8828	-69.9832	-63.2053	3.37833	0.239002
1ta2	-11.6423	-66.3656	-64.9645	0.660213	0.046669
1ta6	-12.4726	-56.5992	-56.9997	1.98087	0.140007
1tcw	-8.22022	-45.6508	-36.3503	2.41178	0.170413
1tcx	-9.49477	-74.2276	-60.2458	4.55078	0.321734
1td7	-5.96468	-28.0812	-23.6093	0.522302	0.0367696
1thz	-7.03318	-41.3428	-35.7162	2.45223	0.173241
1tkb	-10.928	-56.0932	-51.8472	2.13929	0.151321
1tng	-4.00486	-21.3488	-23.3845	0.607002	0.0431335
1tnh	-4.59868	-19.0688	-21.4102	1.40182	0.0989949
1tni	-5.464	-21.5384	-25.8953	0.471832	0.033234
1tog	-4.40105	-25.8788	-23.4653	0.430236	0.0304056
1toi	-5.5265	-25.1788	-25.3215	0.343099	0.0240416
1toj	-4.62694	-25.5488	-26.0475	0.309267	0.0219203
1tok	-3.372	-16.4716	-15.5165	0.109796	0.00777817
1tom	-11.3392	-52.0828	-51.6165	1.01196	0.0714178
1tpw	-4.50921	-26.4548	-19.745	0.567847	0.0403051
1trd	-7.37359	-27.7712	-26.5988	0.0876154	0.00636396
1tuf	-5.53313	-24.9824	-22.3385	0.453749	0.0318198
1tx7	-6.28641	-24.862	-27.3509	0.222818	0.0155563
1tys	-7.49313	-48.8456	-46.8251	1.42335	0.100409
1u1b	-10.6492	-72.3048	-65.5006	2.21249	0.156271
1u1w	-7.99639	-25.6452	-22.6653	0.222881	0.0155563
1u33	-6.28641	-57.3288	-52.5175	0.506556	0.0360624
1ua4	-5.76705	-48.2692	-48.6507	0.0219878	0.00141421
1ucn	-7.13305	-39.6464	-33.0764	2.09269	0.147785
1ugp	-3.94235	-11.9168	-10.6187	0.315278	0.0226274
1ugw	-4.21573	-24.2364	-22.8755	0.0681732	0.00494975
1ugx	-8.06839	-33.3364	-31.8261	0.326927	0.0233345
1ui0	-9.63784	-22.0996	-21.405	0.131474	0.00919239
1uj5	-4.16713	-27.2964	-25.1087	0.981948	0.0692965
1uj6	-4.16713	-25.644	-27.1586	0.759719	0.0537401
1uou	-10.5168	-42.2928	-43.113	0.39865	0.0282843
1upf	-6.28641	-18.1212	-19.1678	0.356067	0.0254558
1ur9	-7.88121	-68.2348	-73.8681	0.917698	0.0650538
1urg	-7.95546	-42.234	-38.9957	0.529578	0.0374767
1usi	-9.2133	-36.3548	-34.5487	0.25549	0.0183848
1usk	-8.73959	-34.7512	-30.7408	0.261989	0.0183848
1utc	-6.21918	-56.0236	-50.8853	0.00206742	0
1utj	-5.24768	-23.5608	-21.1036	0.157881	0.0113137
1utl	-3.37026	-25.3716	-19.5846	0.0899343	0.00636396
1utm	-4.11485	-24.1884	-24.1911	0.723227	0.0509117
1utn	-4.77211	-21.352	-18.5269	0.402959	0.0282843
1uto	-3.1064	-20.39	-20.1127	0.380749	0.0268701
1uv6	-6.99476	-36.8824	-36.4339	0.860039	0.0608112
1uvt	-10.4339	-49.0128	-47.8651	0.298541	0.0212132
1uw6	-10.0331	-37.8884	-38.0394	0.28166	0.019799
1uwf	-9.32146	-31.356	-27.8543	0.466353	0.033234
1uwt	-8.15034	-28.7588	-28.435	0.0448756	0.00282843
1uwu	-8.17273	-34.7604	-33.992	0.00448478	0
1uz1	-9.40635	-27.8124	-24.8766	0.369524	0.026163
1uz4	-4.64159	-26.4716	-25.435	0.226852	0.0162635
1uz8	-6.77346	-55.218	-49.051	0.452774	0.0318198
1v0k	-6.96238	-30.1536	-30.4203	0.382207	0.0268701
1v0l	-10.3172	-39.1932	-36.332	0.109129	0.00777817
1v11	-5.43619	-48.9204	-55.4665	1.14085	0.0806102
1v16	-5.28684	-56.3528	-64.163	0.00371406	0
1v1j	-6.58946	-22.9276	-24.0902	0.113044	0.00777817
1v1m	-5.38109	-50.1644	-58.7539	2.39169	0.168999
1v2j	-4.43565	-26.1012	-24.2222	0.489648	0.0346482
1v2k	-8.45156	-63.1892	-56.7045	2.00215	0.141421
1v2l	-5.86346	-24.4404	-22.9727	1.00546	0.0714178
1v2n	-8.06362	-46.9828	-44.9896	1.12908	0.0799031
1v2o	-6.46665	-39.0872	-38.4133	0.246302	0.0176777
1v2q	-5.64568	-38.768	-42.9586	0.836256	0.059397
1v2r	-4.85539	-35.7544	-41.1819	0.310738	0.0219203
1v2s	-5.69279	-22.7548	-23.389	0.122439	0.00848528
1v2t	-6.43199	-34.5128	-35.9518	0.0519357	0.00353553
1v2u	-4.60284	-23.7736	-22.3727	0.0289782	0.00212132
1v2w	-5.47726	-40.0004	-32.2363	0.228186	0.0162635
1vj9	-10.3172	-64.0612	-63.1408	0.632762	0.0445477
1vja	-10.5168	-62.512	-56.0393	1.0452	0.0742462
1vjd	-4.8406	-54.36	-41.4445	1.10183	0.0777817
1vjj	-7.88121	-40.5308	-38.3632	2.06391	0.145664
1vot	-9.01841	-47.3044	-45.0079	0.00473646	0
1vso	-6.44985	-34.4264	-31.6316	0.638781	0.0452548
1vwn	-7.95546	-60.8468	-59.4938	0.745177	0.053033
1vyf	-10.9905	-49.2516	-49.6646	0.0646113	0.00424264
1vyg	-10.928	-50.8804	-47.7818	1.14722	0.0813173
1vyq	-7.24358	-49.9292	-46.7884	0.12561	0.00919239
1vzq	-10.1681	-57.934	-55.3046	0.263839	0.0183848
1w0z	-10.4878	-57.13	-54.1823	0.659145	0.046669
1w11	-11.231	-56.2316	-56.5599	0.374505	0.026163
1w13	-11.8828	-62.4916	-59.0711	0.614663	0.0431335
1w2g	-6.24076	-44.04	-38.7482	0.0286811	0.00212132
1w3j	-8.6265	-28.4812	-26.9756	0.413865	0.0289914
1w3k	-5.87521	-41.8664	-40.2689	0.40564	0.0289914
1w3l	-8.58394	-51.048	-46.925	0.381641	0.0268701
1w4o	-7.13305	-38.3752	-32.6276	0.0739691	0.00494975
1w4p	-6.4813	-34.796	-30.7208	0.192783	0.013435
1w4q	-7.18466	-38.1652	-31.5923	0.35112	0.0247487
1w5v	-11.1312	-97.8508	-85.9634	1.4684	0.103945
1w5w	-12.0152	-98.6772	-83.9184	4.26917	0.301935
1w5x	-11.4716	-100.416	-86.5842	0.372904	0.026163
1w5y	-11.5857	-99.8152	-88.1495	1.27562	0.0905097
1w6y	-7.31704	-32.1208	-33.8201	0.401664	0.0282843
1w7g	-6.96238	-54.7492	-48.6981	1.48873	0.105359
1w7x	-11.4716	-64.0196	-63.3671	0.936401	0.066468
1w96	-11.4866	-74.0244	-69.2143	0.0464914	0.00353553
1w9u	-8.32101	-59.9748	-40.9322	0.553709	0.0388909
1w9v	-8.65667	-55.1392	-40.4183	0.562909	0.039598
1wcq	-8.55066	-44.7552	-38.8311	0.154205	0.0106066
1wdn	-8.60721	-33.474	-29.6859	1.00978	0.0714178
1wei	-12.294	-20.1932	-21.0915	0.58476	0.0410122
1wht	-5.05279	-12.2812	-3.72113	3.5645	0.25173
1wm1	-8.60721	-35.9316	-36.8185	0.0379849	0.00282843
1ws1	-13.0492	-51.444	-47.8483	0.376738	0.0268701
1ws4	-4.098	-26.9024	-24.3353	0.0912259	0.00636396
1ws5	-4.14361	-26.2068	-23.7726	0.0475225	0.00353553
1wvj	-9.19704	-47.2372	-42.3561	0.0425084	0.00282843
1x1z	-15.1018	-38.6608	-36.0557	0.0949781	0.00636396
1x38	-11.9792	-40.2648	-35.6323	0.705614	0.0502046
1x39	-12.597	-44.5792	-37.7495	0.71167	0.0502046
1x8d	-3.01943	-25.2712	-21.0163	0.0806217	0.00565685
1x8j	-9.50546	-37.2968	-41.1223	0.639589	0.0452548
1x8r	-8.36667	-82.9624	-84.7652	1.39759	0.0989949
1x8t	-10.6492	-67.2288	-66.7525	1.02028	0.0721249
1x9d	-5.40746	-40.5088	-33.6367	0.182206	0.0127279
1xa5	-8.87943	-81.832	-86.0388	1.59981	0.113137
1xap	-11.8828	-64.2	-58.7482	0.166827	0.0120208
1xbb	-7.24121	-51.6368	-50.0126	0.139933	0.00989949
1xbo	-8.24547	-62.86	-58.3693	0.335992	0.0240416
1xd0	-9.73267	-87.2304	-86.1367	0.508981	0.0360624
1xff	-6.58946	-30.5592	-30.0528	0.42876	0.0304056
1xgi	-6.63039	-40.1776	-36.4106	0.587971	0.0417193
1xgj	-8.196	-35.0588	-34.6204	0.113092	0.00777817
1xh4	-10.202	-88.1564	-77.9176	0.0457124	0.00353553
1xh5	-7.47	-79.5012	-71.046	1.73208	0.122329
1xh6	-9.99742	-85.05	-80.8829	0.0358258	0.00282843
1xh7	-9.32146	-91.1944	-83.4951	1.14614	0.0813173
1xh9	-10.6132	-85.3856	-75.3836	1.64274	0.115966
1xhy	-8.44071	-39.1188	-35.116	1.17891	0.0834386
1xjd	-12.9517	-69.5288	-64.947	0.0774265	0.00565685
1xk5	-8.196	-52.2588	-59.527	1.66125	0.11738
1xk9	-9.36239	-36.9852	-35.888	0.566838	0.0403051
1xka	-9.40181	-55.044	-50.2484	0.77685	0.0551543
1xkk	-11.6423	-80.0728	-84.3446	0.599637	0.0424264
1xow	-12.6819	-55.474	-52.3447	0.246171	0.0176777
1xr8	-9.15079	-109.979	-95.827	3.54437	0.250316
1xr9	-9.7736	-115.724	-107.188	2.60962	0.184555
1xt8	-9.36239	-26.0668	-24.0171	0.286897	0.0205061
1xzx	-13.963	-62.9372	-56.6501	0.119499	0.00848528
1y0l	-12.294	-37.4764	-34.237	1.02132	0.0721249
1y1z	-4.20783	-27.1184	-25.6436	0.175781	0.0127279
1y20	-7.26542	-24.5712	-22.7382	0.387337	0.0275772
1y3n	-7.58518	-41.9308	-38.261	1.35583	0.0961665
1y3p	-6.58946	-74.9908	-75.0603	0.681922	0.0480833
1y4z	-9.89547	-31.896	-28.9989	0.00601121	0.000707107
1y6q	-15.9808	-63.876	-57.9198	0.121855	0.00848528
1y6r	-13.8151	-62.9772	-57.5101	0.494094	0.0346482
1yc1	-8.42479	-46.392	-42.1226	0.212032	0.0148492
1yc4	-8.95118	-40.226	-36.8446	0.282405	0.019799
1ydk	-8.04035	-49.9864	-44.4227	0.864907	0.0608112
1ydr	-7.54425	-47.6264	-43.8026	0.0507209	0.00353553
1yds	-8.08784	-40.422	-38.4518	1.16417	0.0820244
1ydt	-9.99742	-58.6724	-55.0758	0.132934	0.00919239
1yon	-5.75724	-59.7968	-53.7202	5.84083	0.41295
1yqj	-11.1147	-67.282	-65.4542	0.794418	0.0558614
1yvm	-8.73959	-23.2712	-16.2738	1.44478	0.101823
1z1h	-11.4716	-76.3948	-66.1409	0.988868	0.0700036
1z1r	-12.597	-82.8896	-73.8365	3.56509	0.252437
1z3t	-5.38109	-48.046	-43.7938	17.5175	1.23885
1z3v	-5.61905	-43.2672	-40.2226	1.03154	0.072832
1z6e	-13.2792	-64.6664	-63.9272	0.187645	0.013435
1z6s	-5.92467	-26.0104	-26.4054	1.36893	0.0968736
1z71	-12.5405	-64.8652	-56.5891	0.341752	0.0240416
1zc9	-4.40105	-28.3188	-25.273	0.146298	0.0106066
1zea	-7.13305	-62.5772	-51.3109	1.34836	0.0954594
1zgi	-7.29067	-56.0472	-59.6803	1.17224	0.0827315
1zhy	-8.91025	-62.628	-62.9082	0.377655	0.0268701
1zky	-8.53998	-47.0668	-42.5529	0.122176	0.00848528
1zlv	-8.4076	-48.094	-52.3669	0.670366	0.0473762
1zog	-9.7736	-41.5356	-38.692	1.14117	0.0806102
1zoh	-9.562	-43.5276	-38.7248	0.673856	0.0473762
1zp8	-11.9792	-79.304	-72.8492	0.0834402	0.00565685
1zpa	-11.4716	-77.8864	-63.8119	2.26387	0.159806
1zsf	-13.5518	-97.3816	-80.308	0.874766	0.0615183
1zsr	-13.4195	-89.5988	-73.236	0.612286	0.0431335
220l	-4.64159	-18.402	-15.7578	0.0336853	0.00212132
2a4m	-6.17825	-31.5112	-31.0726	0.803431	0.0565685
2a5b	-5.37086	-38.6764	-34.4557	0.0371322	0.00282843
2a5c	-6.31063	-38.936	-37.2145	1.24183	0.0876812
2a8g	-5.03814	-35.0052	-35.1838	0.807313	0.0572756
2aac	-3.03505	-31.5228	-27.6746	0.021787	0.00141421
2aj8	-8.46261	-50.7776	-45.8417	1.12542	0.0799031
2am4	-5.08322	-60.4296	-57.2796	0.30986	0.0219203
2ans	-8.08784	-36.9056	-37.3521	0.942877	0.066468
2aoc	-6.67435	-107.608	-98.1078	0.364843	0.0254558
2aod	-7.7364	-110.583	-98.9107	0.49474	0.0346482
2aoe	-10.4086	-94.828	-96.1009	1.04245	0.0735391
2aog	-8.57264	-101.907	-94.8023	0.722582	0.0509117
2aou	-10.5598	-57.4712	-54.6851	0.897519	0.0636396
2aov	-9.61795	-37.3856	-34.9122	0.687368	0.0487904
2aqu	-12.7294	-89.3412	-83.6098	0.0751647	0.00565685
2arm	-10.4878	-28.0848	-19.7802	1.6324	0.115258
2ate	-9.65148	-31.6144	-41.4072	0.448749	0.0318198
2avm	-7.78479	-105.216	-96.6662	0.361564	0.0254558
2avo	-12.0944	-83.39	-73.4887	1.91379	0.135057
2avq	-5.99294	-105.424	-94.4757	0.455224	0.0325269
2avs	-10.3388	-88.3004	-82.2536	0.338708	0.0240416
2avv	-12.6487	-80.108	-71.8869	0.806459	0.0572756
2ayr	-12.6935	-80.4196	-69.6117	1.4135	0.0997021
2azr	-4.96988	-40.2276	-37.057	0.315517	0.0226274
2b07	-8.78584	-55.3016	-48.3309	0.027029	0.00212132
2b1g	-9.06788	-58.2068	-50.0265	0.739555	0.0523259
2b1v	-7.8473	-39.6356	-41.3695	0.371192	0.026163
2b4l	-6.51521	-29.278	-26.7749	0.0126098	0.000707107
2b7d	-11.8828	-57.4428	-48.2142	1.7646	0.124451
2baj	-11.4716	-69.8888	-63.8431	0.249118	0.0176777
2bak	-10.1518	-88.2052	-80.908	0.33718	0.0240416
2bal	-8.61919	-50.6516	-48.0885	0.511344	0.0360624
2bes	-5.79747	-26.268	-27.1419	1.66192	0.11738
2bet	-3.78321	-18.5356	-18.5339	0.278675	0.019799
2bfq	-9.40635	-75.728	-66.1766	0.684255	0.0480833
2bmk	-7.67663	-40.1144	-27.5479	0.406784	0.0289914
2bo4	-6.29598	-8.2036	-16.1095	2.44988	0.173241
2boh	-11.6423	-70.1532	-63.7761	0.652235	0.0459619
2boj	-7.88121	-15.3344	-8.76194	3.02106	0.213546
2bok	-8.95118	-58.274	-51.8333	0.795048	0.0565685
2bpv	-10.4822	-83.8836	-75.8785	0.467704	0.033234
2bpy	-10.1086	-87.4392	-79.2072	0.192816	0.013435
2bq7	-9.63113	-61.336	-57.9031	0.371306	0.026163
2bqv	-10.9905	-85.4044	-77.2029	0.854932	0.0601041
2br1	-7.02488	-44.9856	-47.061	1.18433	0.0834386
2brb	-6.64324	-44.3788	-40.7637	1.01429	0.0714178
2brm	-8.04035	-43.8628	-40.722	1.27764	0.0905097
2bt9	-8.46076	-25.1616	-23.2825	0.238723	0.0169706
2bvd	-8.196	-38.6868	-36.5955	0.712126	0.0502046
2bvr	-5.05279	-40.8408	-33.0356	1.28253	0.0905097
2bvs	-5.59638	-55.47	-53.0846	5.13659	0.363453
2bxt	-11.6423	-65.6424	-59.0497	1.18224	0.0834386
2byr	-11.6832	-84.7604	-73.3779	1.24651	0.0883883
2bys	-13.0083	-64.9564	-57.3076	2.45714	0.173948
2bz6	-9.68701	-59.7592	-54.738	0.162769	0.0113137
2bza	-3.82663	-20.7524	-20.182	0.0662841	0.00494975
2c02	-5.51347	-48.4032	-33.471	2.22834	0.157685
2c1p	-7.37359	-44.4676	-39.9869	0.347783	0.0247487
2c3j	-8.4434	-39.468	-31.3068	1.5482	0.109602
2c3l	-6.92086	-34.522	-33.9187	0.614812	0.0431335
2c80	-7.27791	-48.6448	-50.2018	1.4523	0.10253
2c92	-7.75303	-65.3184	-59.5223	0.474998	0.033234
2c94	-9.32146	-61.8884	-61.1682	0.52393	0.0367696
2c97	-8.39088	-31.3756	-31.5711	0.0547105	0.00353553
2ca8	-6.36225	-33.5096	-33.5726	0.831333	0.0586899
2cbj	-11.2936	-38.734	-40.9327	0.0982036	0.00707107
2cbu	-7.75585	-31.188	-30.2201	0.248384	0.0176777
2cbv	-7.48771	-34.7092	-30.3076	0.145464	0.0106066
2ce9	-8.23905	-58.7444	-52.3795	0.326709	0.0233345
2cej	-11.7746	-89.6152	-80.0618	0.293793	0.0205061
2cen	-11.3392	-89.564	-79.3292	0.108473	0.00777817
2ceq	-9.93864	-30.93	-27.53	0.289407	0.0205061
2ces	-9.90598	-31.388	-28.3665	0.86825	0.0615183
2cet	-10.9522	-43.7156	-41.981	0.696619	0.0494975
2cf8	-11.0604	-61.2256	-57.6584	0.714589	0.0502046
2cf9	-10.6875	-63.2312	-56.7339	0.305669	0.0219203
2cgf	-8.75461	-42.316	-38.8185	0.640392	0.0452548
2cgr	-9.93864	-52.8632	-47.9477	0.0248425	0.00141421
2cht	-7.54425	-24.616	-23.7361	0.433183	0.0304056
2cia	-8.78584	-74.868	-67.8867	1.46399	0.103238
2cji	-11.231	-68.392	-59.2691	0.47935	0.0339411
2cle	-4.85318	-26.5848	-35.9322	2.24285	0.158392
2clf	-4.85318	-32.5812	-25.6157	0.433025	0.0304056
2clh	-5.54254	-47.9196	-45.9923	0.0854745	0.00636396
2cli	-5.87521	-44.9712	-39.7657	0.893647	0.0629325
2clk	-5.17052	-28.6688	-26.0505	0.0279095	0.00212132
2cll	-5.87521	-47.3592	-43.6211	0.802579	0.0565685
2clm	-4.85318	-30.4904	-28.7451	0.198319	0.0141421
2clo	-5.54254	-48.6332	-44.6051	0.47102	0.033234
2cn0	-10.4603	-56.6796	-54.2944	1.72907	0.122329
2csn	-6.02261	-39.078	-37.2051	0.259093	0.0183848
2d0k	-6.85981	-47.26	-41.5856	0.335399	0.0240416
2d3u	-9.45384	-47.3204	-41.9494	0.480942	0.0339411
2d3z	-9.06788	-47.0836	-41.0802	0.0272898	0.00212132
2drc	-13.5044	-50.152	-43.9875	2.90742	0.205768
2dri	-9.40635	-27.5672	-28.0874	0.0437979	0.00282843
2e2p	-6.4813	-46.2288	-40.7821	0.540991	0.0381838
2e2r	-11.2827	-38.0136	-38.3057	0.131691	0.00919239
2e5y	-7.99639	-63.1128	-57.9927	0.700552	0.0494975
2e7f	-8.33584	-44.208	-43.2655	1.53858	0.108894
2epn	-9.86505	-35.7496	-31.5847	1.653	0.116673
2er6	-9.86505	-99.2864	-93.4637	4.03234	0.284964
2er9	-10.1056	-99.59	-79.4363	2.47772	0.175362
2erz	-7.72825	-44.4924	-46.22	1.23614	0.0876812
2euk	-9.01841	-98.3744	-104.925	1.28642	0.0912168
2eum	-9.15079	-59.8532	-66.5344	0.719459	0.0509117
2evl	-9.15079	-76.0284	-78.0737	0.915072	0.0650538
2ewa	-10.8451	-48.2512	-47.5774	0.803941	0.0565685
2exm	-5.6114	-34.952	-31.8536	0.297692	0.0212132
2f1g	-10.2964	-58.7436	-55.5996	0.429221	0.0304056
2f34	-9.40635	-37.888	-37.3996	0.518518	0.0367696
2f35	-7.38255	-36.626	-29.5412	0.00133418	0
2f5t	-7.05879	-54.416	-53.8992	0.585925	0.0417193
2f80	-11.1745	-75.298	-69.7569	0.218783	0.0155563
2f81	-14.3743	-77.3728	-71.4515	0.836391	0.059397
2f8g	-11.8828	-77.6868	-68.2161	2.68356	0.189505
2fai	-8.52947	-43.0784	-39.8707	0.222221	0.0155563
2fdp	-10.3611	-86.852	-85.116	1.49056	0.105359
2ff1	-11.2116	-36.202	-31.4509	2.06995	0.146371
2fgi	-10.0331	-69.2528	-58.3131	0.0908657	0.00636396
2fgu	-12.5405	-87.7408	-78.1548	0.113126	0.00777817
2fgv	-8.35881	-85.4916	-73.6825	0.611992	0.0431335
2fle	-10.7284	-102.123	-90.3658	0.116381	0.00848528
2flr	-8.32838	-50.4008	-46.8666	0.0808289	0.00565685
2fpz	-5.40746	-29.6956	-27.7084	0.149402	0.0106066
2fqo	-8.78584	-44.3324	-40.8411	0.719492	0.0509117
2fqt	-8.39088	-42.3572	-40.3998	0.527261	0.0374767
2fqw	-9.12185	-44.232	-42.028	0.427318	0.0304056
2fqx	-9.76518	-47.4624	-44.1298	1.28142	0.0905097
2fqy	-8.97276	-45.8788	-41.7549	0.138238	0.00989949
2fr3	-11.8828	-44.4524	-42.0154	0.322818	0.0226274
2fvd	-11.6423	-57.0156	-53.6912	0.0543114	0.00353553
2fw6	-3.98984	-29.8284	-15.5803	3.69829	0.26163
2fwp	-3.98984	-26.538	-23.5247	1.34555	0.0954594
2fx6	-5.05279	-27.2948	-25.0302	0.249221	0.0176777
2fxs	-8.27862	-41.9092	-37.996	0.522291	0.0367696
2fxu	-11.1396	-77.1004	-71.7227	0.0732984	0.00494975
2fxv	-7.30371	-54.7808	-48.3623	0.708387	0.0502046
2g5u	-11.604	-43.9372	-42.6459	0.594568	0.0417193
2g70	-10.6132	-43.2352	-40.7036	0.761028	0.0537401
2g71	-10.1848	-53.8108	-46.2241	0.464688	0.0325269
2g72	-8.88131	-58.864	-51.5728	0.920518	0.0650538
2g78	-9.45384	-41.3136	-34.8515	0.501619	0.0353553
2g79	-9.45384	-42.2368	-40.2933	1.067	0.0756604
2g8r	-5.44646	-30.6244	-21.8523	1.32558	0.0940452
2g94	-13.0083	-96.2364	-89.3912	0.744421	0.0523259
2g9q	-8.73959	-25.084	-18.3921	0.384421	0.0268701
2gek	-10.2763	-43.0948	-50.6567	0.596091	0.0424264
2gfd	-8.58394	-54.1896	-47.773	0.990692	0.0700036
2gj5	-11.3709	-39.9164	-43.0888	4.00088	0.282843
2gl0	-6.58946	-42.5536	-32.6834	0.297067	0.0212132
2glp	-6.84807	-47.8212	-48.604	1.83092	0.129401
2gss	-6.74709	-27.84	-27.3711	0.591782	0.0417193
2gst	-8.29241	-62.6552	-59.4848	0.919228	0.0650538
2gv6	-10.0227	-52.2444	-55.0319	1.08265	0.0763675
2gv7	-10.7284	-71.8196	-68.2516	0.362095	0.0254558
2gvj	-13.0083	-61.9212	-61.178	1.2875	0.0912168
2gvv	-5.33162	-36.2716	-30.3394	1.25103	0.0883883
2gz2	-7.13305	-22.508	-19.39	0.626701	0.0445477
2h4g	-8.91025	-43.8784	-39.3455	0.290039	0.0205061
2h4k	-7.50597	-45.4472	-40.5389	0.404361	0.0282843
2h6b	-7.35894	-29.5712	-28.5074	0.634713	0.0445477
2h6q	-6.9774	-66.196	-59.9504	5.63146	0.398101
2ha2	-6.36225	-54.8	-55.249	0.237945	0.0169706
2ha3	-4.14105	-24.072	-23.3823	0.677743	0.0480833
2ha5	-5.92467	-28.2168	-32.3245	0.303823	0.0212132
2ha6	-5.89942	-54.4812	-57.2548	0.869837	0.0615183
2hah	-10.928	-55.1244	-49.5384	1.39989	0.0989949
2hb1	-5.18517	-36.5968	-32.6548	0.292381	0.0205061
2hb3	-15.4997	-82.2292	-74.0998	1.09585	0.0777817
2hhn	-10.238	-65.0276	-61.0294	0.98533	0.0700036
2hjb	-6.00315	-34.0616	-33.2043	0.854088	0.0601041
2hkf	-8.71064	-83.2144	-77.2259	2.76072	0.195161
2hr6	-6.58946	-29.1084	-22.9795	0.198027	0.0141421
2hrm	-4.85637	-26.7704	-20.2177	0.234847	0.0162635
2hs1	-11.5857	-71.9412	-69.0035	0.317996	0.0226274
2hs2	-11.3512	-74.5164	-71.6439	0.0882717	0.00636396
2hw2	-4.05786	-85.9668	-73.663	1.33572	0.0947523
2hxm	-7.13305	-44.52	-38.3788	0.128997	0.00919239
2hzl	-8.97276	-13.1676	-11.4962	0.659447	0.046669
2hzy	-10.0909	-33.8692	-19.0234	7.05929	0.499217
2i0a	-15.5696	-72.864	-61.7691	3.37209	0.238295
2i0g	-13.2792	-49.4844	-44.3126	1.34432	0.0947523
2i2b	-3.33809	-28.6832	-25.4393	0.412483	0.0289914
2i2c	-6.41879	-62	-61.0149	2.07442	0.146371
2i2e	-6.00759	-43.5248	-47.9957	2.04169	0.14425
2i4d	-15.9518	-85.5592	-79.816	0.0805298	0.00565685
2i4j	-8.42062	-72.522	-68.6132	1.70789	0.120915
2i4u	-15.8028	-81.4124	-74.403	0.281895	0.019799
2i4v	-15.3001	-78.45	-68.6689	3.42944	0.242538
2i4w	-15.8251	-99.7268	-86.1459	1.26109	0.0890955
2i4x	-16.0112	-95.0528	-84.5373	0.0864895	0.00636396
2i4z	-7.79135	-70.9364	-67.5403	0.938935	0.066468
2i80	-7.37359	-44.5504	-43.7226	1.08415	0.0763675
2idw	-12.1384	-74.8792	-72.8575	0.241617	0.0169706
2ien	-12.294	-76.4616	-73.0398	0.278087	0.019799
2ieo	-11.604	-76.3152	-70.7424	0.199667	0.0141421
2ihj	-6.27003	-76.8748	-70.9551	0.357797	0.0254558
2ihq	-11.604	-55.9864	-53.0159	0.267843	0.0190919
2iko	-7.44089	-49.6456	-46.0926	1.50052	0.106066
2il2	-9.70184	-84.4676	-79.6427	1.83563	0.130108
2imd	-11.3392	-34.9948	-38.1406	0.124581	0.00848528
2itk	-10.505	-55.7776	-54.2829	0.335618	0.0240416
2iuz	-7.58518	-53.6288	-47.8447	1.21939	0.086267
2ivu	-8.77787	-56.6812	-52.0184	0.595436	0.0424264
2iwx	-9.12185	-43.548	-43.1713	0.663151	0.046669
2iyf	-5.12426	-63.2892	-64.2879	0.0418982	0.00282843
2izl	-8.196	-49.1336	-41.2249	0.735907	0.0523259
2j27	-4.81225	-21.54	-13.6592	0.587592	0.0417193
2j2u	-10.0099	-65.01	-58.2417	0.235766	0.0169706
2j34	-10.6875	-62.5012	-58.2519	0.547801	0.0388909
2j47	-7.38861	-46.094	-42.9321	0.157219	0.0113137
2j4g	-9.01841	-44.4748	-39.6964	0.527816	0.0374767
2j4i	-12.294	-68.2116	-63.1053	0.504911	0.0353553
2j62	-15.4867	-48.2528	-42.2073	0.987139	0.0700036
2j75	-9.08092	-32.1448	-30.389	0.116102	0.00848528
2j77	-6.67893	-27.2832	-27.9309	0.0236257	0.00141421
2j78	-8.7638	-27.1632	-25.7936	1.0252	0.072832
2j79	-8.13946	-32.7568	-28.2365	0.0487821	0.00353553
2j7b	-9.04263	-33.974	-31.0659	0.274384	0.0190919
2j7d	-9.74063	-39.6712	-36.4427	0.42499	0.0296985
2j7e	-9.99742	-41.8772	-37.0638	0.432743	0.0304056
2j7f	-8.67634	-33.1284	-28.5237	0.221115	0.0155563
2j7g	-9.562	-34.7924	-26.6341	1.40015	0.0989949
2j7h	-9.81756	-27.9844	-27.0956	0.239487	0.0169706
2j94	-8.56818	-62.6132	-58.2568	0.165556	0.0120208
2j95	-11.4716	-64.8608	-57.9308	0.0645475	0.00424264
2j9n	-6.41879	-23.838	-21.8665	0.0556912	0.00424264
2jdh	-8.8908	-25.2876	-20.1304	1.87143	0.132229
2jdk	-8.93036	-25.0068	-24.7424	0.413416	0.0289914
2jdm	-7.37955	-22.9052	-14.5289	0.150482	0.0106066
2jdn	-7.58943	-21.5448	-14.5702	2.62224	0.185262
2jdp	-9.01841	-16.7756	-6.33519	3.22605	0.228395
2jds	-11.2021	-56.392	-50.7457	0.137093	0.00989949
2jdu	-9.18122	-21.3676	-17.1476	0.159766	0.0113137
2jdv	-11.2021	-66.7984	-57.8413	0.137104	0.00989949
2jdy	-5.96606	-20.32	-17.1293	0.676294	0.0480833
2jf4	-11.1396	-61.3144	-56.405	0.029827	0.00212132
2jfh	-4.18062	-40.02	-39.8941	0.64715	0.0459619
2jfz	-7.15316	-60.2628	-51.8043	0.381681	0.0268701
2jg0	-10.6875	-63.2476	-57.7134	0.245872	0.0176777
2jgs	-9.04263	-39.2504	-38.4563	0.101548	0.00707107
2jh0	-11.8828	-60.5692	-54.1104	0.489331	0.0346482
2jh5	-8.79067	-58.7924	-47.4865	1.55073	0.109602
2jh6	-10.6132	-58.7368	-56.8685	0.229265	0.0162635
2jiw	-6.26315	-40.7436	-36.4077	0.406808	0.0289914
2jj3	-13.0492	-52.7268	-49.5753	0.0994836	0.00707107
2jjb	-10.8198	-60.1064	-56.313	0.197014	0.0141421
2jke	-5.77702	-30.2896	-31.4393	0.958746	0.0678823
2jkh	-10.9905	-62.6936	-54.4632	0.803164	0.0565685
2jkp	-5.77702	-32.3636	-31.4762	0.254588	0.0176777
2jxr	-9.6245	-82.6696	-82.2124	1.46228	0.103238
2mas	-10.2763	-40.6956	-39.9521	0.38353	0.0268701
2nmy	-11.4287	-80.4484	-79.8839	0.0207467	0.00141421
2nmz	-11.4287	-86.5328	-75.3888	0.918276	0.0650538
2nn8	-4.89715	-26.3532	-23.536	0.16677	0.0120208
2nnd	-8.27862	-28.7908	-27.4399	0.0480097	0.00353553
2nnk	-11.4287	-89.1416	-80.4046	0.172611	0.0120208
2nnp	-11.4287	-91.1568	-76.8464	1.00826	0.0714178
2nsj	-6.54015	-35.1928	-33.0741	0.606527	0.0431335
2nsl	-6.39268	-33.5028	-32.3304	0.188697	0.013435
2nt7	-8.91025	-62.6248	-63.6599	0.889781	0.0629325
2nta	-6.55117	-44.7188	-41.0109	0.271152	0.0190919
2o0u	-7.50597	-68.3584	-61.4523	0.574497	0.0403051
2o1c	-6.44922	-1.0076	0.900024	1.4738	0.103945
2o2u	-8.73959	-52.4436	-48.3336	1.43585	0.101823
2o4j	-13.7924	-76.2776	-71.2346	0.187298	0.013435
2o4k	-14.2828	-93.4108	-82.4028	0.451405	0.0318198
2o4l	-12.5892	-88.3804	-78.2663	1.10352	0.0777817
2o4n	-10.6875	-85.3376	-74.6559	1.03623	0.0735391
2o4p	-14.6452	-86.0232	-75.1377	1.07289	0.0756604
2o4r	-12.8376	-73.3288	-67.2254	0.213647	0.0148492
2o4s	-14.3548	-87.46	-73.7775	0.905881	0.0643467
2oag	-11.568	-54.2484	-49.8819	1.11771	0.079196
2obf	-12.0944	-59.7808	-57.5115	0.0331766	0.00212132
2ogy	-6.11813	-42.968	-44.8456	2.0673	0.146371
2ojg	-7.70188	-48.82	-43.6989	0.615382	0.0438406
2ojj	-11.8828	-61.3464	-58.8642	0.562484	0.039598
2ok1	-8.55066	-47.3612	-40.7811	0.107472	0.00777817
2olb	-7.56436	-82.5412	-75.5846	0.831309	0.0586899
2ole	-9.90386	-52.4952	-51.2221	1.24334	0.0876812
2on6	-9.24027	-42.5672	-41.3095	0.59256	0.0417193
2ot1	-5.464	-32.8004	-36.4807	0.171173	0.0120208
2oxd	-9.32146	-36.068	-30.749	0.579019	0.0410122
2oxn	-10.1681	-34.1368	-31.7406	0.473471	0.033234
2oxx	-9.15079	-36.7756	-37.7911	0.546597	0.0388909
2oxy	-8.91025	-32.7636	-34.5719	1.05112	0.0742462
2oyk	-7.24121	-42.866	-35.2464	0.352575	0.0247487
2oyl	-8.60721	-42.5488	-31.1478	1.27911	0.0905097
2oym	-6.83	-47.7292	-41.3896	0.0717943	0.00494975
2p15	-14.0712	-66.6748	-61.2882	0.201064	0.0141421
2p16	-13.7924	-67.5268	-60.0274	0.254148	0.0176777
2p2a	-8.36667	-64.5972	-53.5302	3.06953	0.217082
2p3a	-10.8715	-102.276	-86.3376	3.06606	0.217082
2p3b	-11.5857	-101.734	-92.1603	0.43726	0.0311127
2p3c	-10.4086	-104.044	-81.9127	0.427315	0.0304056
2p3i	-4.75571	-28.044	-25.3375	0.320722	0.0226274
2p4j	-12.2375	-102.378	-97.5354	2.70625	0.191626
2p4y	-12.294	-75.2676	-74.2418	0.0596394	0.00424264
2p7a	-8.33735	-24.6096	-21.7934	0.0674775	0.00494975
2p7g	-8.91621	-39.5624	-37.6469	0.611371	0.0431335
2p7z	-8.9906	-60.7932	-57.5847	0.274348	0.0190919
2p95	-12.7947	-63.2572	-57.0931	0.74559	0.053033
2pbw	-11.2762	-51.528	-45.8346	1.00773	0.0714178
2pcp	-11.8828	-44.32	-43.636	0.723554	0.0509117
2pfy	-8.91025	-30.6684	-29.4075	0.125236	0.00919239
2pgz	-7.8473	-58.0428	-56.0358	0.271564	0.0190919
2pk5	-14.6148	-105.538	-88.0825	0.556693	0.039598
2pk6	-14.8704	-101.962	-87.3287	0.831216	0.0586899
2pmk	-8.08784	-44.7836	-43.8578	0.209168	0.0148492
2pnc	-4.55098	-39.3552	-40.3734	0.749348	0.053033
2pog	-13.0284	-42.7008	-42.1784	0.102617	0.00707107
2pq9	-11.0754	-68.6192	-84.3699	0.609469	0.0431335
2pqb	-9.8361	-67.6288	-72.2682	0.0957248	0.00707107
2pqc	-7.8473	-51.7996	-65.2588	0.334831	0.0233345
2pql	-9.93864	-34.076	-28.1847	0.245169	0.0176777
2pqz	-7.74189	-75.2072	-67.6118	0.104569	0.00707107
2psj	-10.5168	-43.4604	-40.2101	0.115365	0.00848528
2psu	-10.4086	-69.6236	-67.398	0.156673	0.0113137
2psv	-9.88516	-65.8764	-60.2952	0.244536	0.0169706
2pu2	-6.05384	-39.1444	-38.036	0.119466	0.00848528
2pv1	-9.7487	-72.6612	-62.5402	2.19562	0.155563
2pvh	-8.99515	-48.9424	-44.9783	1.11856	0.079196
2pvj	-11.0604	-57.6296	-54.4354	0.233399	0.0162635
2pvl	-10.4086	-54.3848	-49.7242	0.702227	0.0494975
2pvm	-8.80209	-45.2312	-49.4023	1.22136	0.086267
2pwc	-8.97276	-81.44	-71.7491	1.3761	0.0975807
2pwd	-6.00759	-31.8648	-30.1464	0.672094	0.0473762
2pwg	-6.58946	-37.3276	-34.5238	0.96412	0.0678823
2pwr	-8.99515	-87.562	-73.7684	0.599578	0.0424264
2pyi	-5.1186	-56.818	-55.0184	0.129348	0.00919239
2pym	-9.32146	-79.5092	-63.7993	1.00855	0.0714178
2pyn	-10.3388	-77.1512	-70.9674	1.25226	0.0883883
2q54	-12.306	-79.2528	-65.3245	1.5907	0.11243
2q55	-11.871	-81.8968	-69.6437	1.11142	0.0784889
2q5k	-15.4372	-86.4632	-68.8895	0.0425102	0.00282843
2q63	-9.8085	-73.886	-72.3338	0.151052	0.0106066
2q64	-11.6423	-79.13	-67.1831	2.33344	0.164756
2q6f	-7.43609	-84.6432	-78.0182	0.0713307	0.00494975
2q88	-7.91717	-25.664	-19.9559	2.5502	0.180312
2q89	-8.60721	-29.4004	-24.6901	1.44951	0.10253
2q8h	-4.098	-18.6516	-18.0219	0.10128	0.00707107
2q8z	-7.75585	-56.656	-52.3008	0.953829	0.0671751
2qbp	-11.4716	-65.5344	-54.2643	1.8662	0.132229
2qbq	-10.1681	-55.6088	-48.8816	0.128502	0.00919239
2qbr	-8.64391	-53.5224	-47.9593	2.10763	0.1492
2qbs	-9.12185	-55.9692	-48.359	0.671487	0.0473762
2qbu	-8.45614	-63.704	-58.6067	0.382371	0.0268701
2qbw	-9.90598	-110.188	-96.7556	0.316414	0.0226274
2qci	-11.3887	-80.2552	-75.2897	0.468809	0.033234
2qd6	-11.8538	-80.1712	-77.0033	0.559711	0.039598
2qd7	-12.4264	-76.1228	-74.2869	0.702565	0.0494975
2qd8	-12.3904	-79.5688	-73.9648	0.687945	0.0487904
2qe4	-10.8715	-47.6596	-44.8026	0.110666	0.00777817
2qfo	-6.41879	-23.3312	-22.1476	0.0317167	0.00212132
2qft	-7.18466	-34.7752	-32.0252	0.537625	0.0381838
2qfu	-5.7105	-34.6432	-27.6173	0.320639	0.0226274
2qg0	-7.81522	-50.0504	-44.1404	0.504288	0.0353553
2qg2	-7.37359	-55.2536	-51.6584	0.184467	0.0127279
2qhd	-7.34464	-28.36	-30.4402	0.573134	0.0403051
2qhm	-8.4425	-45.8648	-38.867	0.966061	0.0685894
2qhy	-10.2197	-76.1836	-60.4398	3.84192	0.271529
2qhz	-9.93864	-74.3884	-64.8839	0.393494	0.0275772
2qi0	-10.0766	-75.5888	-57.9556	2.64043	0.186676
2qi1	-9.97321	-76.8548	-67.9073	1.64611	0.116673
2qi3	-13.9341	-72.2412	-68.6581	0.322772	0.0226274
2qi4	-14.2661	-78.4168	-65.3382	3.02775	0.214253
2qi5	-14.8264	-79.5684	-72.3024	0.910317	0.0643467
2qi6	-14.4368	-73.8676	-68.2743	0.431647	0.0304056
2qi7	-13.9436	-71.9172	-64.8197	2.18388	0.154149
2qm7	-8.04035	-52.6316	-46.5198	0.597941	0.0424264
2qm9	-10.6132	-58.3136	-56.3355	0.404206	0.0282843
2qmg	-12.5056	-89.4052	-82.7892	3.59399	0.253851
2qmj	-5.74759	-58.158	-48.8822	5.02788	0.355675
2qnn	-9.7736	-88.0132	-82.231	0.391509	0.0275772
2qnp	-8.75461	-80.5784	-72.836	2.65416	0.187383
2qnq	-8.35105	-78.596	-71.3178	1.38466	0.0975807
2qpq	-8.69668	-27.672	-21.0995	1.38953	0.0982878
2qpu	-4.92041	-43.46	-41.8933	0.344488	0.0240416
2qrg	-7.0765	-60.336	-55.5348	0.344028	0.0240416
2qrh	-6.43078	-56.0316	-51.8857	0.180614	0.0127279
2qrk	-5.81866	-36.1876	-34.6697	0.55441	0.0388909
2qrl	-5.464	-14.3288	-15.8534	0.0687048	0.00494975
2qrm	-5.51025	-64.2544	-55.1755	0.421055	0.0296985
2qrp	-8.4701	-65.1384	-60.5243	0.596874	0.0424264
2qrq	-6.96984	-50.92	-51.6211	3.02863	0.214253
2qry	-11.7999	-49.9396	-47.8563	2.20761	0.156271
2qt5	-6.86671	-43.9952	-38.5232	1.04175	0.0735391
2qtg	-6.94054	-48.8472	-42.2706	0.293371	0.0205061
2qtt	-5.89942	-51.278	-42.1045	1.92637	0.136472
2qu6	-11.6423	-74.8856	-73.8799	0.661864	0.046669
2qw1	-5.33162	-15.5892	-15.9369	1.33949	0.0947523
2qwb	-3.74274	-32.048	-34.0053	1.30207	0.0919239
2qwc	-4.85318	-34.132	-32.0099	0.977098	0.0692965
2qwd	-6.63039	-38.8828	-35.6097	0.785536	0.0558614
2qwf	-7.73914	-53.0696	-47.0613	0.00129823	0
2r0h	-4.7928	-39.5684	-37.1172	0.496468	0.0353553
2r2m	-10.0087	-54.8052	-53.4487	0.741896	0.0523259
2r2w	-6.104	-44.3132	-37.9998	0.0135615	0.000707107
2r38	-10.1681	-84.444	-72.9193	0.466968	0.033234
2r3t	-7.99639	-85.2556	-74.571	0.835904	0.059397
2r3w	-9.41555	-77.8252	-71.4013	0.631513	0.0445477
2r43	-8.196	-78.89	-70.5849	0.014243	0.000707107
2r58	-2.732	-24.9832	-22.3165	0.224034	0.0155563
2r5a	-3.55441	-21.9368	-18.6334	0.399213	0.0282843
2r5p	-11.5857	-87.2036	-79.6785	0.0285748	0.00212132
2r6w	-12.781	-67.8672	-67.6346	1.29078	0.0912168
2r6y	-12.97	-69.3484	-62.0744	0.144311	0.00989949
2r9w	-6.96238	-41.3632	-40.4432	0.081901	0.00565685
2r9x	-6.63039	-39.0356	-37.2907	0.990779	0.0700036
2ra0	-10.6529	-66.7368	-60.7691	1.73685	0.123037
2rcb	-9.27215	-24.5796	-23.306	0.471015	0.033234
2reg	-7.70188	-35.0512	-31.6005	0.0542892	0.00353553
2rin	-5.464	-38.3068	-36.6082	0.315821	0.0226274
2rk7	-5.53313	-8.7772	-8.60163	0.369632	0.026163
2rk8	-4.96988	-11.9108	-16.5036	1.86417	0.131522
2rka	-4.098	-13.0048	-14.7442	0.396047	0.0282843
2rkd	-3.71722	-13.1356	-17.5087	0.508534	0.0360624
2rke	-5.57812	-23.666	-18.023	0.955431	0.0678823
2rkf	-12.4045	-71.5892	-73.6612	0.821986	0.0579828
2rkg	-11.0457	-79.7428	-71.0475	0.511763	0.0360624
2rkm	-5.33162	-56.5204	-51.6692	0.632277	0.0445477
2sim	-4.67202	-38.25	-34.3008	0.399885	0.0282843
2std	-13.4604	-46.0496	-42.7288	0.115908	0.00848528
2tpi	-5.88719	-44.5216	-40.758	0.566861	0.0403051
2uwl	-11.4716	-58.9588	-49.1866	0.201042	0.0141421
2uwo	-11.8828	-58.804	-55.252	0.238159	0.0169706
2uxi	-9.97321	-29.6936	-38.7079	0.787535	0.0558614
2uxu	-6.4813	-28.5744	-33.1256	0.508301	0.0360624
2uxz	-11.5857	-95.9452	-80.5867	2.39286	0.168999
2uy0	-9.45384	-97.5572	-81.2933	1.08158	0.0763675
2uy3	-4.40105	-28.3904	-23.4558	0.73176	0.0516188
2uy4	-6.38985	-23.6848	-19.6983	0.263545	0.0183848
2uy5	-7.50597	-36.1328	-32.445	0.504191	0.0353553
2v00	-4.99625	-31.334	-23.0664	2.9194	0.206475
2v2c	-4.65661	-20.0636	-16.0632	0.0998744	0.00707107
2v2h	-5.14921	-25.8048	-12.8932	1.59528	0.113137
2v2q	-5.66551	-44.0612	-35.2592	1.3532	0.0954594
2v2v	-5.55486	-45.6868	-40.3777	0.137446	0.00989949
2v3d	-5.37595	-36.6648	-34.7346	0.301022	0.0212132
2v3u	-4.098	-24.3556	-24.8236	0.307415	0.0219203
2v57	-9.70184	-32.1952	-29.9904	0.321098	0.0226274
2v58	-12.4117	-44.0572	-39.8563	0.0358362	0.00282843
2v59	-11.1808	-48.6968	-42.5909	0.155678	0.0113137
2v7d	-8.99515	-58.5708	-61.6324	1.51807	0.10748
2v8w	-9.32146	-39.7444	-40.5105	3.52342	0.248902
2v95	-11.3392	-48.8784	-45.0609	0.0399795	0.00282843
2vb8	-6.28641	-38.8148	-35.9671	1.30114	0.0919239
2vba	-6.28641	-39.292	-38.0925	0.511867	0.0360624
2vc9	-11.5341	-39.0604	-37.5109	2.0154	0.142836
2vfk	-5.07086	-32.404	-25.0732	5.5396	0.391737
2vh6	-13.2488	-64.222	-58.7538	0.22349	0.0155563
2vhj	-5.33162	-46.5468	-47.7014	1.10609	0.0784889
2vjx	-6.77346	-26.3276	-23.7435	1.73625	0.123037
2vk2	-9.40635	-26.1752	-28.4387	0.585763	0.0417193
2vkm	-11.9453	-105.092	-93.7163	0.9321	0.0657609
2vl4	-8.21102	-36.3424	-31.2212	1.37207	0.0968736
2vmf	-7.99639	-34.2448	-26.5115	0.912485	0.0643467
2vnt	-10.934	-51.6572	-47.9994	0.0473427	0.00353553
2vo4	-6.74195	-21.5964	-15.2941	1.13331	0.0799031
2vo5	-6.67435	-46.1072	-45.5134	0.934206	0.0657609
2vot	-9.75688	-47.2812	-37.2436	0.185478	0.013435
2vqt	-8.196	-41.016	-34.2886	0.421677	0.0296985
2vr4	-7.75585	-40.8292	-41.9043	0.150736	0.0106066
2vrj	-8.60721	-46.4856	-41.7742	0.670392	0.0473762
2vt3	-5.6756	-34.252	-32.6158	1.11895	0.079196
2vvc	-11.6423	-71.4584	-64.019	0.014715	0.000707107
2vvp	-4.64159	-29.7644	-30.079	2.25928	0.159806
2vvu	-11.0604	-62.8764	-57.6316	0.40031	0.0282843
2vvv	-11.231	-67.58	-57.2735	0.0587705	0.00424264
2vw5	-11.6423	-56.66	-53.5177	0.54441	0.0381838
2vwc	-9.04263	-56.5772	-53.1909	0.288121	0.0205061
2vwm	-9.60505	-70.9072	-69.0428	0.464987	0.0325269
2vwn	-10.928	-63.7144	-61.2115	0.335975	0.0240416
2vx9	-10.1681	-33.2244	-49.5437	1.04576	0.0742462
2vxn	-6.83	-29.6236	-22.1874	0.734399	0.0516188
2vyt	-3.73626	-20.14	-17.5263	0.355536	0.0254558
2vzr	-5.84513	-17.1244	-13.9577	0.277214	0.019799
2w08	-4.67202	-3.9564	0.332686	0.362344	0.0254558
2w26	-12.8376	-59.3308	-59.5355	0.259081	0.0183848
2w47	-6.80106	-15.8768	-13.9363	0.236194	0.0169706
2w4x	-6.63039	-40.4984	-38.6475	0.184426	0.0127279
2w5g	-8.28548	-43.9144	-33.6073	3.01518	0.213546
2w5i	-6.19836	-42.686	-32.1254	2.28626	0.161927
2w66	-5.53313	-39.4924	-38.9025	0.474314	0.033234
2w67	-6.77346	-38.7868	-36.7735	0.614134	0.0431335
2w7y	-8.30654	-60.0672	-48.7617	3.08715	0.218496
2w87	-6.35688	-13.3744	-15.2647	0.345573	0.0247487
2w8j	-4.04146	-54.7048	-53.4384	1.44804	0.10253
2w8w	-2.90267	-54.038	-50.3024	0.516402	0.0367696
2w8y	-12.4117	-80.3452	-73.4041	0.186067	0.013435
2w9h	-12.3121	-38.0416	-37.0573	1.758	0.124451
2wb5	-12.4726	-49.0672	-40.3895	1.25872	0.0890955
2wca	-7.65241	-44.0744	-42.6599	0.164404	0.0113137
2web	-6.99281	-60.4048	-50.8745	2.47291	0.174655
2wec	-5.40746	-43.478	-41.6245	1.14211	0.0806102
2wed	-8.32838	-55.7392	-50.9659	8.31593	0.588313
2weq	-8.0542	-62.9312	-57.7134	0.359537	0.0254558
2wer	-9.6245	-44.4296	-37.3728	0.141692	0.00989949
2whp	-5.464	-48.9592	-41.9404	0.280004	0.019799
2wjg	-9.69438	-54.4812	-48.209	0.729216	0.0516188
2wk2	-9.32146	-75.7	-72.6669	2.76354	0.195161
2wk6	-4.53342	-26.8724	-27.7694	0.556077	0.039598
2wky	-11.734	-44.9052	-43.416	0.484	0.0339411
2wkz	-11.9792	-96.1012	-88.7522	0.730216	0.0516188
2wl0	-10.6492	-94.336	-86.0072	1.10011	0.0777817
2wly	-9.01841	-51.3004	-43.7002	2.71663	0.192333
2wlz	-6.28641	-54.3564	-39.5524	2.0529	0.144957
2wm0	-6.17825	-72.958	-57.5578	0.178326	0.0127279
2wn9	-11.6423	-37.5916	-34.0888	0.875008	0.0622254
2wnc	-8.63266	-48.5136	-43.8926	0.46692	0.033234
2wnj	-8.85371	-49.2652	-47.7283	0.0602465	0.00424264
2wp1	-4.91805	-50.272	-52.585	0.198832	0.0141421
2wpb	-3.94235	-26.3924	-31.902	0.275205	0.019799
2wq5	-5.1153	-51.9012	-49.4039	0.482816	0.0339411
2wqp	-7.5248	-50.6992	-47.1986	1.02115	0.0721249
2wtv	-11.9453	-59.8964	-54.4171	1.22101	0.086267
2wtx	-3.94235	-45.3156	-41.8271	1.15468	0.0813173
2wuf	-5.86346	-49.3792	-47.7628	0.0456071	0.00353553
2wvt	-8.36272	-29.7856	-26.5305	0.268176	0.0190919
2wvz	-5.48822	-29.8392	-29.4845	0.482521	0.0339411
2ww2	-6.63039	-34.4728	-35.0001	0.228343	0.0162635
2wyg	-11.8828	-60.3144	-52.1305	0.0747488	0.00494975
2wyj	-12.294	-57.6428	-52.0946	2.96731	0.210011
2wyn	-7.58518	-56.4324	-51.2903	0.17022	0.0120208
2wzm	-7.13305	-68.7888	-60.4464	2.67113	0.188798
2wzs	-5.26439	-25.3764	-29.0326	1.83649	0.130108
2x00	-15.4739	-63.0848	-65.556	2.8388	0.200818
2x09	-5.13201	-31.6752	-28.9328	0.71487	0.0502046
2x0y	-6.28641	-42.1264	-39.9361	1.14281	0.0806102
2x4z	-11.7048	-64.09	-63.4021	0.45562	0.0325269
2xab	-12.6596	-44.0976	-40.7561	0.292708	0.0205061
2xb7	-12.5496	-68.5544	-59.4946	1.39595	0.0989949
2xb8	-10.3611	-47.7392	-43.158	1.7966	0.127279
2xba	-10.4166	-53.2616	-50.7144	0.124626	0.00848528
2xbw	-10.928	-78.954	-68.6256	0.119754	0.00848528
2xc4	-10.9905	-73.9304	-62.9765	0.0638896	0.00424264
2xde	-7.46652	-44.4456	-41.9879	0.67863	0.0480833
2xdk	-4.92041	-25.8288	-24.1968	0.173309	0.0120208
2xdl	-4.23784	-41.182	-36.6597	0.0731622	0.00494975
2xdx	-8.8188	-33.2232	-32.1933	0.319632	0.0226274
2xht	-8.13946	-45.3928	-40.7867	0.492258	0.0346482
2xj7	-9.09425	-40.3812	-35.6677	0.343458	0.0240416
2xjg	-10.6875	-49.6712	-43.662	0.0577073	0.00424264
2xjj	-8.8908	-49.6296	-43.919	0.399471	0.0282843
2xjx	-12.4972	-46.1552	-42.2621	0.531986	0.0374767
2xmy	-13.6035	-62.6068	-56.4485	0.128803	0.00919239
2xnb	-9.32543	-55.8544	-49.8095	0.111166	0.00777817
2ypi	-6.58946	-16.5624	-6.52745	1.32803	0.0940452
2yxj	-12.7052	-78.7228	-76.5102	0.0325842	0.00212132
2z4b	-12.781	-47.4504	-45.5293	0.310804	0.0219203
2z4o	-13.0708	-80.9928	-76.2139	0.626499	0.0445477
2za5	-11.5178	-64.6244	-60.8252	1.14494	0.0806102
2zaz	-8.73959	-45.9364	-38.5731	0.810154	0.0572756
2zb0	-9.04263	-56.944	-55.4648	0.403468	0.0282843
2zb1	-8.63142	-59.7748	-54.121	1.11106	0.0784889
2zc9	-9.2133	-53.3936	-51.2061	0.155824	0.0113137
2zcs	-11.231	-36.1748	-38.6997	0.8178	0.0579828
2zda	-11.4716	-55.6564	-55.5788	1.36515	0.0968736
2zdk	-8.69945	-52.3728	-47.1276	0.784086	0.0551543
2zdl	-8.73663	-51.0668	-44.1324	0.296672	0.0212132
2zdm	-8.76072	-50.4084	-47.237	0.349182	0.0247487
2zdn	-8.53786	-52.9472	-46.3157	0.962711	0.0678823
2zfp	-7.05879	-45.0352	-45.3403	0.500997	0.0353553
2zfs	-8.93653	-53.8908	-43.848	2.37206	0.167584
2zft	-8.91025	-49.4916	-43.4526	1.24208	0.0876812
2zgx	-9.2133	-47.5892	-45.1943	0.406708	0.0289914
2zhd	-8.93653	-53.33	-47.3381	0.976386	0.0692965
2zif	-5.96468	-55.2108	-55.2633	0.3869	0.0275772
2zjw	-10.5168	-39.6068	-38.8772	0.658951	0.046669
2zm3	-8.48536	-50.184	-45.7402	0.486744	0.0346482
2zn7	-10.7724	-59.5704	-50.2765	1.0102	0.0714178
2zo3	-13.66	-57.2048	-58.9664	0.505742	0.0360624
2zpk	-10.596	-59.0188	-53.5973	0.303076	0.0212132
2zq0	-9.32146	-72.0784	-66.1431	1.23322	0.0869741
2zq1	-9.04511	-48.548	-49.1225	0.487274	0.0346482
2zq2	-8.95972	-53.3944	-49.7299	0.676374	0.0480833
2zwz	-10.6382	-40.8188	-40.374	0.0206181	0.00141421
2zxd	-7.13305	-36.1908	-37.7324	0.789282	0.0558614
2zy1	-10.1056	-42.2644	-37.0333	1.21121	0.0855599
2zym	-8.3827	-88.7504	-80.6148	1.13376	0.0799031
2zz1	-6.19836	-40.1272	-40.4102	0.303214	0.0212132
3a1t	-6.59742	-39.8064	-41.8176	0.239952	0.0169706
3a2o	-12.4045	-81.7552	-71.3226	0.966364	0.0685894
3a5y	-10.8715	-90.2992	-80.6452	0.676524	0.0480833
3a6t	-9.94994	-34.6476	-37.1408	0.614542	0.0431335
3aaq	-4.50921	-48.5684	-37.8342	1.9095	0.135057
3aas	-6.1588	-29.7256	-31.0063	1.3558	0.0961665
3aau	-6.8925	-40.6932	-40.2696	1.26794	0.0898026
3acw	-6.49801	-47.3364	-42.8543	1.59956	0.113137
3acx	-7.78479	-60.5972	-49.715	0.511317	0.0360624
3ads	-6.84624	-41.1228	-46.603	0.439487	0.0311127
3adv	-4.13914	-25.8248	-26.3418	0.111139	0.00777817
3ag9	-10.9905	-85.4368	-79.7748	5.22337	0.36911
3agl	-10.6492	-97.8884	-103.471	1.6548	0.116673
3aid	-9.37524	-54.9384	-55.4935	1.48379	0.104652
3b2q	-6.21918	-44.8392	-57.3037	1.71084	0.120915
3b2t	-7.11264	-36.7572	-37.3742	0.268859	0.0190919
3b3x	-4.92041	-17.6836	-15.4381	0.311189	0.0219203
3b4p	-7.37359	-30.344	-31.0144	0.175707	0.0127279
3b50	-10.3172	-44.2992	-37.2974	1.12513	0.0799031
3b5j	-7.75585	-48.7052	-44.212	1.54984	0.109602
3b5r	-11.9792	-65.4956	-61.0911	1.21147	0.0855599
3b65	-12.6596	-69.5316	-63.0626	0.0222486	0.00141421
3b66	-11.7504	-71.3836	-65.1982	0.32604	0.0233345
3b67	-12.0944	-68.69	-60.5591	1.00127	0.0707107
3b68	-11.4716	-73.7484	-68.0204	0.173564	0.0120208
3b7j	-7.05879	-22.9532	-25.1147	0.540659	0.0381838
3b9g	-6.44922	-39.6404	-34.0874	0.536638	0.0381838
3bbb	-9.562	-47.7216	-48.8468	0.0569396	0.00424264
3bc3	-9.30201	-87.228	-80.8876	0.424256	0.0296985
3bc4	-7.30371	-24.7008	-25.2034	0.224515	0.0155563
3be9	-10.4086	-55.4316	-50.8875	1.90369	0.13435
3bex	-7.60676	-36.3888	-32.9593	0.0420438	0.00282843
3bf1	-3.44625	-35.4468	-29.7885	2.89785	0.205061
3bfu	-8.57152	-35.8128	-34.6677	0.382726	0.0268701
3bgb	-8.2585	-76.006	-70.2151	0.559508	0.039598
3bgc	-6.85422	-80.3288	-71.2031	1.41982	0.100409
3bgq	-10.8715	-48.8272	-43.9734	1.61722	0.114551
3bgs	-12.868	-44.9732	-39.7115	1.57695	0.111723
3bgz	-8.55066	-40.7964	-36.3672	0.957096	0.0678823
3bra	-3.68679	-16.2848	-18.4151	2.3929	0.168999
3brn	-11.8828	-34.0628	-32.0321	0.363489	0.0254558
3bu1	-11.1312	-25.5928	-21.8389	0.319284	0.0226274
3buf	-4.23038	-16.8692	-19.7279	0.0942592	0.00636396
3bug	-4.3445	-23.184	-21.6186	1.27562	0.0905097
3buh	-4.99625	-28.488	-30.226	1.73699	0.123037
3bv9	-7.31704	-62.6756	-59.9346	2.48892	0.17607
3bva	-8.91025	-94.0652	-84.9756	0.269077	0.0190919
3bvb	-7.50597	-74.4808	-69.8794	1.55587	0.110309
3bwj	-8.87382	-86.4804	-75.7034	1.67211	0.118087
3bxe	-7.48056	-22.2056	-23.2968	0.0556433	0.00424264
3bxf	-7.57053	-50.426	-51.6982	1.58805	0.11243
3bxg	-6.77454	-44.7216	-43.364	0.81536	0.0579828
3bxh	-5.49857	-42.316	-40.1952	0.374933	0.026163
3bze	-8.196	-118.164	-85.72	6.1911	0.437699
3bzf	-6.17825	-109.264	-101.769	3.45235	0.243952
3c1k	-12.9001	-65.7252	-63.5077	0.452419	0.0318198
3c2o	-4.57171	-15.2428	-13.341	0.987708	0.0700036
3c2r	-4.2454	-16.4148	-14.7549	0.723559	0.0509117
3c2u	-3.96562	-66.9088	-63.9328	0.75317	0.053033
3c4h	-7.78479	-32.2788	-29.3721	0.0074852	0.000707107
3c79	-9.8361	-46.6936	-39.6278	0.371569	0.026163
3cct	-10.33	-71.8192	-65.474	0.585659	0.0417193
3ccw	-10.75	-66.736	-53.3082	3.71065	0.262337
3ccz	-9.95337	-63.1892	-54.8661	0.423454	0.0296985
3cd0	-10.341	-65.3476	-56.0204	2.15062	0.152028
3cd5	-10.7862	-75.8796	-64.2701	0.213062	0.0148492
3cd7	-10.7158	-66.8	-62.816	0.864241	0.0608112
3cda	-10.3543	-74.8272	-59.104	0.749223	0.053033
3cdb	-9.58807	-71.4464	-59.3329	0.509052	0.0360624
3cf8	-6.6882	-32.9	-36.4388	1.02194	0.0721249
3cfn	-6.83	-34.0912	-33.2097	0.949183	0.0671751
3cft	-5.72876	-27.2436	-25.3479	0.610166	0.0431335
3cj2	-6.63039	-35.0952	-29.8901	0.0557473	0.00424264
3cj4	-8.8908	-44.4468	-40.5227	0.696561	0.0494975
3cj5	-8.65667	-46.5672	-39.7901	1.68471	0.118794
3ckb	-4.07473	-39.8792	-35.8861	0.426706	0.0304056
3ckp	-8.67103	-78.974	-75.2641	1.34038	0.0947523
3clp	-5.03785	-49.0272	-46.6371	0.111053	0.00777817
3cow	-9.42962	-73.4292	-70.2529	0.43848	0.0311127
3coy	-8.22022	-71.0024	-63.5407	0.279708	0.019799
3coz	-7.60676	-67.8524	-63.6964	1.23469	0.0869741
3ctt	-8.66971	-36.2848	-37.213	0.0383172	0.00282843
3cwk	-9.01841	-40.4952	-38.5802	0.113666	0.00777817
3cyw	-10.6132	-76.1388	-73.9748	0.551473	0.0388909
3cyx	-10.928	-88.3028	-80.2426	0.196743	0.0141421
3d0b	-8.93036	-61.436	-53.8363	0.693241	0.0487904
3d0e	-11.4716	-77.8672	-75.9548	0.94823	0.0671751
3d1e	-7.88121	-62.2504	-56.3759	0.732425	0.0516188
3d1x	-11.8263	-87.3128	-79.8089	0.329574	0.0233345
3d1y	-11.231	-91.3468	-80.4861	0.885897	0.0629325
3d1z	-12.0152	-79.3716	-72.4225	0.377674	0.0268701
3d20	-11.3392	-76.8912	-71.4683	2.76066	0.195161
3d6o	-5.61905	-25.7384	-24.3556	0.986983	0.0700036
3d6p	-5.1186	-24.9712	-21.7081	0.318828	0.0226274
3d6q	-5.14227	-27.0452	-28.1184	0.811077	0.0572756
3d78	-10.4339	-31.1832	-34.8686	0.521772	0.0367696
3d7b	-5.04396	-24.1756	-24.9747	0.480136	0.0339411
3d7k	-6.28641	-54.8712	-47.2509	0.59978	0.0424264
3d83	-11.415	-76.0176	-67.9203	0.95595	0.0678823
3d8y	-4.64755	-23.758	-25.5043	0.272605	0.0190919
3d8z	-4.60842	-26.7956	-23.8012	0.37471	0.026163
3da9	-7.5248	-48.8588	-43.1897	0.0664055	0.00494975
3dhv	-4.04146	-34.73	-36.4038	0.82773	0.0586899
3djk	-14.4591	-78.7424	-74.8318	0.563337	0.039598
3djo	-5.99584	-34.7748	-31.2426	0.0810135	0.00565685
3djp	-5.73622	-39.494	-32.9815	1.09855	0.0777817
3djq	-4.07109	-38.3384	-29.2732	0.273141	0.0190919
3djv	-6.2213	-36.4728	-33.8658	1.90867	0.135057
3djx	-3.83499	-34.5088	-34.6054	1.24613	0.0883883
3dk1	-13.3113	-79.7732	-73.8336	0.174075	0.0120208
3dkf	-11.7048	-30.442	-41.3046	2.09007	0.147785
3dkg	-6.83	-42.0868	-40.818	0.121112	0.00848528
3dnd	-6.55117	-31.8652	-30.9181	0.0390476	0.00282843
3dne	-7.13305	-35.666	-30.6092	0.223943	0.0155563
3dnj	-9.32146	-44.9888	-41.8775	0.128129	0.00919239
3dp9	-13.2255	-70.0648	-66.9108	0.336942	0.0240416
3drf	-9.562	-86.2284	-78.6474	0.833265	0.0586899
3drg	-9.562	-122.507	-124.913	0.51236	0.0360624
3dri	-6.04272	-33.8416	-34.8525	0.086522	0.00636396
3dsz	-10.6097	-74.4708	-63.7566	2.90266	0.205061
3dux	-9.562	-58.4208	-49.5466	0.846425	0.0601041
3dvp	-6.83	-75.596	-72.7302	0.741258	0.0523259
3dxg	-3.27559	-31.4072	-28.5627	1.75164	0.123744
3dxh	-4.35356	-31.782	-32.9702	3.42766	0.242538
3dzt	-9.86307	-63.2744	-53.5579	0.929262	0.0657609
3e3c	-7.67663	-28.0176	-32.6466	0.145092	0.0106066
3e5a	-11.241	-58.436	-42.5751	1.64916	0.116673
3e5u	-7.99639	-31.9344	-27.1387	0.303725	0.0212132
3e6y	-7.65241	-50.1332	-54.2504	3.73758	0.264458
3eax	-6.72184	-37.668	-44.7426	4.28256	0.302642
3eb1	-6.54015	-35.7712	-27.6946	1.01926	0.0721249
3ebl	-8.60721	-48.912	-46.61	0.233933	0.0162635
3ed0	-8.66971	-30.3388	-31.1166	0.902742	0.0636396
3eeb	-8.04035	-40.614	-41.2542	0.344175	0.0240416
3efs	-7.29067	-59.06	-51.3555	3.57892	0.253144
3eig	-10.4878	-69.516	-61.036	0.0446535	0.00282843
3eko	-9.15079	-33.4612	-30.7503	0.974483	0.0685894
3ekr	-10.2763	-44.6884	-37.8804	0.671095	0.0473762
3eks	-7.78479	-61.4912	-56.3445	0.692407	0.0487904
3eqr	-11.8828	-75.7892	-73.5241	1.4565	0.103238
3ery	-7.72825	-93.3644	-98.4748	0.921906	0.0650538
3evc	-9.43439	-39.398	-34.3606	0.129827	0.00919239
3evd	-9.43439	-47.6056	-39.7669	4.19144	0.296278
3ew2	-9.10789	-39.7904	-33.6689	0.191524	0.013435
3exe	-9.50546	-50.898	-63.8255	0.71854	0.0509117
3exh	-6.66981	-48.0036	-43.5518	4.63954	0.328098
3eys	-7.54425	-62.4996	-55.1055	2.39147	0.168999
3f35	-4.31813	-29.2964	-28.6269	0.617552	0.0438406
3f3a	-5.72139	-37.1076	-41.5894	0.292794	0.0205061
3f3c	-8.22643	-34.7352	-36.9458	0.593133	0.0417193
3f3t	-6.26315	-59.5464	-54.8769	1.20612	0.0855599
3f3u	-6.4813	-46.0156	-52.8769	0.152006	0.0106066
3f68	-6.91262	-60.4836	-56.9272	1.91033	0.135057
3f78	-4.23038	-22.4964	-19.3535	0.354625	0.0247487
3f80	-5.76705	-30.3248	-32.3327	0.0579386	0.00424264
3f82	-11.3887	-77.2256	-70.6682	1.27318	0.0898026
3f8c	-10.4878	-63.1892	-59.8451	0.332195	0.0233345
3f8f	-9.0526	-58.4176	-52.9719	0.471803	0.033234
3f9y	-6.13997	-102.423	-96.0839	0.53901	0.0381838
3fat	-10.4391	-38.6588	-35.3755	0.267692	0.0190919
3ffg	-12.3974	-73.352	-68.2005	0.295272	0.0212132
3fj7	-5.06781	-28.8044	-26.8584	1.42346	0.100409
3fjg	-5.09266	-31.6612	-29.1474	1.37297	0.0968736
3fjz	-5.5265	-31.8952	-31.8706	0.875334	0.0622254
3fk1	-3.57371	-30.6744	-29.2567	0.683259	0.0480833
3fl5	-9.94994	-41.9636	-38.3131	1.25553	0.0890955
3fqe	-11.3392	-55.5144	-50.0512	0.819546	0.0579828
3fql	-9.76518	-78.6964	-70.732	0.230004	0.0162635
3fsj	-5.39149	-104.532	-103.076	0.0883929	0.00636396
3fur	-10.928	-70.8116	-64.1588	1.22036	0.086267
3fv3	-13.0083	-76.5108	-71.2715	0.981132	0.0692965
3fvh	-8.67368	-52.6448	-52.0155	1.53243	0.108187
3fwv	-7.70188	-62.9472	-61.9301	0.482024	0.0339411
3g08	-11.1531	-98.2256	-91.0276	1.16955	0.0827315
3g0i	-4.92041	-27.0772	-29.0029	1.06067	0.0749533
3g0w	-13.0083	-61.584	-55.2521	0.456563	0.0325269
3g19	-9.11065	-39.588	-36.5327	0.0189462	0.00141421
3g2h	-5.21834	-47.2836	-48.3073	0.188736	0.013435
3g2i	-6.64324	-47.8796	-49.6982	2.98605	0.211425
3g2j	-6.4846	-44.6128	-36.6062	0.193914	0.013435
3g2k	-6.54748	-67.7552	-63.0166	0.347778	0.0247487
3g2l	-5.28202	-51.0064	-58.3717	0.220648	0.0155563
3g2n	-5.58901	-52.0184	-45.8072	1.43303	0.101116
3g2z	-3.21904	-17.8596	-17.3125	1.1387	0.0806102
3g30	-3.4268	-24.3584	-24.9968	1.19919	0.0848528
3g31	-3.94235	-19.0332	-16.1407	0.29232	0.0205061
3g32	-5.07086	-23.1992	-24.2164	0.200284	0.0141421
3g34	-4.04146	-21.276	-26.1857	0.250262	0.0176777
3g35	-6.38985	-37.4072	-32.816	0.418808	0.0296985
3g3r	-8.85371	-47.8964	-59.341	0.32712	0.0233345
3g5d	-10.8715	-65.3192	-58.3057	0.855138	0.0608112
3g90	-8.68304	-52.284	-40.7948	0.865218	0.0615183
3g9l	-8.37463	-63.3792	-54.0745	0.340391	0.0240416
3ga5	-7.50597	-50.1516	-45.2441	0.136622	0.00989949
3gba	-12.3918	-55.494	-51.187	0.346683	0.0247487
3gbb	-9.42489	-44.7408	-42.3863	0.256844	0.0183848
3gbe	-6.83	-30.0256	-26.2514	0.162328	0.0113137
3gcp	-10.6875	-54.912	-46.3308	0.998559	0.0707107
3gcq	-8.83252	-78.0272	-65.7443	1.81064	0.127986
3gcs	-9.90598	-66.7212	-54.0116	2.67169	0.188798
3gcu	-9.26492	-76.73	-72.8972	0.463282	0.0325269
3gcv	-9.74063	-79.9796	-75.7449	0.601185	0.0424264
3ggt	-11.5178	-76.7728	-70.3813	1.97854	0.140007
3ggu	-13.3452	-78.7176	-67.6221	2.16449	0.152735
3gi4	-14.7472	-74.4064	-71.1008	0.822884	0.0579828
3gi5	-15.329	-70.0968	-74.8344	1.14242	0.0806102
3gi6	-15.329	-73.65	-67.4658	2.63057	0.185969
3gjw	-11.3392	-38.5696	-39.3827	1.09865	0.0777817
3gk1	-5.59638	-29.8396	-32.944	0.476563	0.0339411
3gkz	-10.928	-30.5328	-31.0136	0.13203	0.00919239
3gm0	-10.6132	-36.7576	-33.1975	0.177922	0.0127279
3gnw	-12.4338	-69.5084	-62.0454	1.70048	0.120208
3gpo	-7.24121	-75.2448	-73.9712	0.582413	0.0410122
3gqz	-2.96958	-29.2716	-26.2482	0.0599014	0.00424264
3gr2	-3.44625	-21.64	-18.6395	2.13001	0.150614
3gs6	-8.99515	-34.5532	-34.3313	0.92415	0.0650538
3gsg	-3.68679	-23.6348	-23.3555	3.49216	0.24678
3gsm	-8.85371	-27.2648	-26.5256	1.45148	0.10253
3gss	-7.95546	-56.3956	-48.1616	0.332016	0.0233345
3gst	-9.18122	-62.2652	-60.6782	0.668829	0.0473762
3gtc	-3.20571	-20.2364	-23.0946	0.245647	0.0176777
3gus	-8.2585	-29.4408	-34.0392	0.0351789	0.00282843
3gv9	-2.90267	-23.0816	-22.1228	0.329043	0.0233345
3gvb	-3.53115	-33.94	-32.1467	0.727246	0.0516188
3gx0	-4.75571	-63.738	-57.5458	0.690545	0.0487904
3gy2	-7.8473	-38.356	-32.9601	0.576121	0.0410122
3gy3	-7.6866	-47.0736	-38.606	0.713536	0.0502046
3gy4	-6.96238	-26.3856	-23.3641	0.190288	0.013435
3gy7	-6.17825	-25.398	-21.3728	0.370343	0.026163
3h1x	-8.04035	-26.6228	-19.4757	0.304722	0.0212132
3h30	-6.19429	-36.004	-34.1168	0.782828	0.0551543
3h5b	-13.666	-85.4568	-69.9941	2.24093	0.158392
3h78	-5.79747	-20.9896	-20.7597	0.0222283	0.00141421
3h89	-10.4339	-94.3444	-93.3223	2.58272	0.182434
3h8b	-8.5943	-76.6836	-86.3896	0.268416	0.0190919
3h8c	-10.5472	-79.7932	-74.1324	0.279956	0.019799
3hb4	-12.3565	-64.8328	-58.7934	0.0247926	0.00141421
3hcm	-4.50921	-20.3188	-27.4228	1.06694	0.0756604
3hec	-6.104	-70.966	-66.8659	0.764918	0.0537401
3heg	-9.2133	-72.3476	-62.4942	0.705671	0.0502046
3hek	-11.2936	-60.3292	-54.6734	5.99e-05	0
3hig	-10.7724	-58.6728	-52.2976	0.24802	0.0176777
3hii	-8.93036	-60.1244	-61.7038	0.098974	0.00707107
3hik	-8.67634	-45.3908	-42.5467	0.168206	0.0120208
3hit	-11.1928	-90.7936	-78.278	0.938344	0.066468
3hjo	-8.91025	-24.9556	-24.0098	0.821801	0.0579828
3hk1	-8.43358	-43.7884	-36.1991	2.22916	0.157685
3hkw	-11.7999	-61.81	-56.6647	0.86407	0.0608112
3hky	-9.69438	-63.4576	-56.4752	0.496723	0.0353553
3hl7	-10.4339	-51.1772	-49.48	2.32853	0.164756
3hll	-11.2512	-60.6332	-55.1726	0.410642	0.0289914
3hmo	-10.2664	-57.4408	-55.085	0.47939	0.0339411
3hmp	-7.4986	-33.026	-33.3162	0.300034	0.0212132
3hrf	-6.81246	-31.3032	-26.064	2.12955	0.150614
3hub	-11.0457	-72.928	-67.9669	0.10908	0.00777817
3huc	-8.17846	-50.8544	-46.4341	0.0401234	0.00282843
3hv7	-10.8198	-66.9564	-62.3023	0.0506798	0.00353553
3hv8	-9.53759	-70.0988	-59.7361	0.85096	0.0601041
3hx3	-10.928	-46.598	-43.7389	0.141199	0.00989949
3hxi	-8.64391	-72.6108	-74.8331	0.00384398	0
3i25	-11.6228	-124.984	-110.846	3.15466	0.222739
3i4b	-11.1396	-66.708	-65.0857	0.621339	0.0438406
3i6o	-14.1337	-89.0744	-80.2446	0.389772	0.0275772
3i73	-7.50043	-41.2196	-33.9852	2.7402	0.193747
3i7e	-14.8264	-72.044	-70.2581	0.329969	0.0233345
3iae	-5.30835	-110.838	-101.358	2.08167	0.147078
3ie3	-9.12185	-30.1788	-37.2958	0.420192	0.0296985
3ies	-13.5518	-89.8468	-80.8958	0.387288	0.0275772
3ifl	-11.0314	-71.1816	-60.1017	0.00774531	0.000707107
3ifo	-9.92208	-71.5364	-59.5396	0.717096	0.0509117
3ijg	-5.82955	-16.2476	-19.6952	1.22992	0.0869741
3ikd	-9.2166	-42.2756	-37.365	2.82535	0.200111
3ikg	-9.89547	-43.3344	-36.8377	0.679491	0.0480833
3ilq	-7.11359	-108.595	-108.803	0.749511	0.053033
3imc	-4.04146	-30.83	-27.6418	0.360367	0.0254558
3ime	-4.098	-19.574	-21.3335	0.523321	0.0367696
3iob	-4.67202	-44.576	-42.7997	0.1845	0.0127279
3ioc	-5.02385	-60.574	-57.7304	0.182305	0.0127279
3iod	-5.59638	-71.7988	-70.1338	0.234965	0.0162635
3ioe	-4.46355	-62.1424	-57.5831	0.793721	0.0558614
3ioi	-8.57264	-39.1292	-43.4953	1.17712	0.0834386
3iok	-10.8715	-49.902	-46.1733	0.930174	0.0657609
3ip8	-3.11994	-30.3136	-25.4837	1.13716	0.0806102
3ipq	-10.3388	-85.584	-78.9459	0.855999	0.0608112
3ipu	-9.99742	-71.3796	-68.4585	0.114247	0.00777817
3iqg	-6.28879	-47.1216	-55.0138	1.92085	0.135765
3iqh	-6.26773	-37.8348	-37.5799	4.87726	0.345068
3iqi	-6.02719	-49.4244	-45.4133	0.619321	0.0438406
3isj	-5.02385	-40.8592	-40.3357	0.448585	0.0318198
3iss	-8.2585	-77.8756	-76.5339	0.0428231	0.00282843
3iub	-6.19836	-49.934	-46.0605	1.02539	0.072832
3iue	-7.95546	-55.5576	-49.4116	1.16633	0.0827315
3ivc	-5.63467	-56.1164	-54.8588	0.303749	0.0212132
3ivg	-5.87521	-55.6908	-48.1243	2.59327	0.183141
3ivx	-7.8473	-60.3636	-55.3817	1.29374	0.0912168
3iw5	-8.30014	-76.4656	-67.6941	0.126538	0.00919239
3iw6	-7.48951	-63.6196	-59.7421	1.40351	0.0989949
3iw7	-7.70188	-51.136	-53.9497	0.35006	0.0247487
3iw8	-6.65637	-61.4584	-52.5511	1.96143	0.138593
3jdw	-4.91334	-27.6492	-24.8999	0.957353	0.0678823
3jrs	-5.85194	-36.8184	-36.4219	0.392099	0.0275772
3jrx	-12.294	-75.46	-67.5747	0.670498	0.0473762
3juo	-6.92293	-40.8408	-36.3198	0.496926	0.0353553
3jup	-7.62234	-38.5144	-33.5948	0.4625	0.0325269
3juq	-6.70239	-38.608	-34.6237	0.220088	0.0155563
3jvk	-5.36581	-22.4084	-20.6728	0.255745	0.0183848
3jvr	-7.81835	-40.3428	-33.4606	1.71031	0.120915
3jvs	-8.93036	-49.5296	-44.3724	0.204878	0.0141421
3jy9	-12.294	-52.7756	-49.7437	1.58969	0.11243
3jyj	-7.8473	-41.0568	-32.6662	0.190122	0.013435
3jyr	-7.56436	-74.4212	-69.5634	1.53832	0.108894
3jzg	-5.41834	-47.7376	-37.0901	1.0512	0.0742462
3jzj	-4.92518	-85.7164	-79.8023	0.894723	0.0629325
3k00	-7.88121	-87.3284	-79.596	1.42122	0.100409
3k02	-6.83	-91.082	-87.6915	1.05435	0.0742462
3k37	-12.1858	-51.2692	-49.6856	1.0063	0.0714178
3k4d	-6.98121	-19.5112	-10.6455	1.47539	0.104652
3k4q	-7.29067	-26.7904	-27.0903	0.946628	0.0671751
3k5v	-8.60721	-43.8356	-39.8431	0.715702	0.0509117
3k8o	-15.1155	-50.8584	-45.2299	0.144761	0.00989949
3k8q	-15.4139	-39.606	-35.2017	0.953492	0.0671751
3k97	-10.928	-46.2648	-42.1846	0.159808	0.0113137
3k99	-9.86505	-42.6068	-41.0008	0.521908	0.0367696
3kdb	-13.4604	-93.63	-80.3102	0.693014	0.0487904
3kdc	-12.6819	-91.478	-81.3147	0.335577	0.0240416
3kdd	-11.5593	-88.2352	-76.9612	0.0417651	0.00282843
3kdm	-9.562	-49.7808	-46.1892	0.471793	0.033234
3kgp	-3.51317	-24.4516	-24.489	0.282724	0.019799
3kgt	-7.5248	-30.1832	-36.7981	0.691046	0.0487904
3kgu	-8.08784	-34.4156	-34.2735	0.584554	0.0410122
3kiv	-6.41879	-22.4676	-20.2611	0.962151	0.0678823
3kjd	-11.6624	-38.1936	-34.4751	0.0861175	0.00636396
3kku	-7.78479	-40.014	-37.59	0.0732264	0.00494975
3kmx	-6.58946	-41.528	-44.2736	0.983871	0.0692965
3kmy	-6.13997	-28.9016	-26.8228	1.33266	0.0940452
3kqb	-12.7052	-71.4744	-67.9932	0.32501	0.0233345
3kqc	-11.8263	-71.2832	-67.6383	0.118932	0.00848528
3kqe	-11.053	-73.678	-67.5573	0.465215	0.033234
3kv2	-8.58737	-25.6056	-28.3705	0.967817	0.0685894
3kyg	-10.1968	-27.83	-47.0922	1.36025	0.0961665
3kyq	-5.76705	-31.4132	-39.1352	0.594771	0.0417193
3kze	-5.39677	-75.536	-67.6732	1.26799	0.0898026
3l1n	-7.69165	-35.6256	-27.1655	1.49015	0.105359
3l4u	-10.2763	-44.6588	-47.1824	0.600359	0.0424264
3l4v	-9.18122	-16.758	-5.53891	2.72652	0.19304
3l4w	-8.196	-29.9332	-26.3331	1.5223	0.10748
3l4x	-9.40635	-24.3388	-22.3261	0.200712	0.0141421
3l4y	-9.562	-20.998	-18.3332	0.189122	0.013435
3l4z	-9.18122	-12.342	-13.7179	0.112347	0.00777817
3l59	-5.05279	-28.9676	-30.9702	0.0358572	0.00282843
3l5b	-5.34119	-35.2572	-31.8874	0.307598	0.0219203
3l6h	-7.37359	-29.8168	-26.886	0.0185664	0.00141421
3l79	-3.36162	-41.1584	-42.4648	0.438507	0.0311127
3l7a	-5.91928	-63.6024	-61.7944	0.42807	0.0304056
3l7b	-3.2741	-41.186	-42.7666	0.0358626	0.00282843
3l7c	-3.32667	-41.798	-42.9341	0.437892	0.0311127
3l7d	-2.98301	-62.1804	-61.0947	1.01505	0.0721249
3l8s	-9.56796	-58.8744	-55.5493	1.69764	0.120208
3lbj	-6.77346	-45.1188	-50.334	0.0668678	0.00494975
3lbk	-8.24805	-43.1916	-39.6251	0.130191	0.00919239
3lbl	-10.1681	-43.3172	-39.0357	0.383076	0.0268701
3lbz	-5.27293	-38.268	-31.3626	0.90266	0.0636396
3lc3	-7.14302	-38.9028	-37.2652	0.35477	0.0247487
3lcu	-4.81225	-64.8516	-63.7826	0.626683	0.0445477
3lcv	-6.4813	-70.9304	-63.1643	0.528053	0.0374767
3le8	-8.28548	-58.4568	-53.1236	0.0705185	0.00494975
3lf0	-7.80593	-78.5104	-69.8118	2.76416	0.195161
3lgs	-6.29118	-39.2712	-37.9092	0.485312	0.0346482
3liw	-10.3844	-61.8668	-56.3932	0.353934	0.0247487
3ljo	-9.04511	-47.0512	-41.0791	1.14235	0.0806102
3lk1	-5.81651	0.0344	-8.09437	0.0431398	0.00282843
3lp7	-7.43609	-38.3928	-37.1604	1.08663	0.0770746
3lpf	-9.12753	-52.2184	-54.102	1.09325	0.0770746
3lpg	-8.42131	-46.2952	-44.944	0.854458	0.0601041
3lpi	-11.6423	-90.6472	-77.7815	1.4311	0.101116
3lpk	-12.4264	-91.8484	-87.1995	4.03676	0.285671
3lxo	-6.58946	-34.1964	-33.7968	1.29936	0.0919239
3lzs	-14.9749	-79.35	-72.5741	0.227632	0.0162635
3lzu	-13.7426	-78.9584	-61.809	3.0436	0.21496
3lzv	-14.4591	-76.3044	-71.7772	0.314612	0.0219203
3lzz	-5.23949	-30.1024	-42.5903	0.00319315	0
3m35	-9.86505	-55.4752	-48.8047	1.98878	0.140714
3m36	-13.4195	-59.8368	-57.1307	0.315245	0.0226274
3m37	-12.3499	-61.2648	-56.0602	0.327653	0.0233345
3m89	-8.41613	-45.9768	-53.6402	0.0640087	0.00424264
3m8u	-6.67893	-94.7416	-87.7193	0.903076	0.0636396
3mf5	-7.32793	-52.63	-47.1798	0.211531	0.0148492
3mfv	-3.44625	-32.0544	-23.3198	0.339238	0.0240416
3mfw	-4.81225	-26.258	-25.4123	0.92972	0.0657609
3mhw	-3.13966	-26.376	-24.3602	0.852162	0.0601041
3mi2	-10.6132	-53.8104	-49.9303	1.04579	0.0742462
3miy	-10.4878	-44.8464	-42.1358	1.94611	0.137886
3mj1	-10.6875	-51.5776	-48.5022	0.825854	0.0586899
3mkn	-5.62681	-43.9428	-42.9266	0.205224	0.0148492
3moe	-5.87521	-25.3144	-26.8916	0.816976	0.0579828
3mof	-4.18748	-11.8812	-11.9977	0.179545	0.0127279
3moh	-3.87349	-18.974	-15.6033	0.0175599	0.00141421
3ms9	-7.13305	-31.0064	-28.9715	0.1681	0.0120208
3mss	-6.36225	-32.3308	-31.3437	1.20316	0.0848528
3mxd	-12.0654	-78.0128	-72.4502	0.11292	0.00777817
3mxe	-13.6781	-77.1444	-74.1945	1.27189	0.0898026
3mxf	-9.98519	-46.8428	-42.6678	0.7319	0.0516188
3n3g	-9.88516	-34.1076	-32.1412	1.39103	0.0982878
3n7o	-9.75688	-57.5872	-55.1862	0.394132	0.0275772
3nee	-7.29067	-41.3668	-41.33	0.337126	0.0240416
3neo	-8.08784	-53.662	-50.4613	0.566946	0.0403051
3nes	-7.67663	-41.6608	-41.7148	0.282922	0.019799
3nex	-8.196	-51.2328	-49.7701	0.14611	0.0106066
3nhi	-11.5178	-61.7112	-52.2244	2.47725	0.175362
3nht	-9.57399	-56.9892	-46.5938	1.93077	0.136472
3nkx	-7.00067	-65.376	-69.9697	1.4411	0.101823
3nox	-11.8263	-45.5204	-49.11	0.257805	0.0183848
3npc	-11.3887	-95.63	-89.5088	0.616122	0.0438406
3nq3	-5.15977	-23.5628	-21.3918	1.85405	0.130815
3nq9	-5.50961	-14.5952	-14.3597	0.222353	0.0155563
3nu3	-13.4195	-75.644	-69.0843	0.943254	0.066468
3nu4	-12.0535	-74.06	-67.346	0.409362	0.0289914
3nu5	-11.4017	-73.4852	-68.774	0.246407	0.0176777
3nu6	-12.7052	-75.7816	-67.3694	1.17562	0.0834386
3nu9	-12.3565	-74.166	-65.0965	1.00145	0.0707107
3nuj	-12.8229	-75.9712	-68.0345	0.876285	0.0622254
3nuo	-13.3812	-77.6736	-69.1804	0.0606421	0.00424264
3o5x	-7.21794	-36.238	-38.2069	0.637401	0.0452548
3o6m	-10.2197	-72.2892	-68.0795	1.03419	0.072832
3o84	-9.88516	-45.4528	-44.3589	0.0391252	0.00282843
3obq	-4.83236	-60.6028	-58.3083	2.06546	0.146371
3obu	-5.87521	-71.0376	-60.6032	1.55075	0.109602
3obx	-5.30835	-73.1896	-61.5966	3.82238	0.270115
3odu	-11.1147	-47.3892	-52.2708	0.198325	0.0141421
3ok9	-15.339	-78.7484	-76.99	0.915125	0.0650538
3oka	-6.44922	-44.6188	-45.8807	0.814017	0.0572756
3okc	-6.06191	-44.5128	-40.1131	1.0262	0.072832
3okp	-6.44922	-40.7744	-34.287	3.17749	0.22486
3oy8	-4.99625	-24.9196	-26.879	0.103997	0.00707107
3oyw	-5.6114	-22.9528	-24.5412	0.935287	0.066468
3p2e	-8.49905	-53.8572	-53.1869	0.00696879	0.000707107
3p5o	-9.9673	-45.042	-42.829	0.487359	0.0346482
3p8p	-6.21918	-48.5208	-44.8308	0.250375	0.0176777
3pb3	-8.49905	-56.7012	-54.0218	0.429441	0.0304056
3pd2	-7.47	-58.068	-47.6587	1.46749	0.103945
3pd3	-6.0668	-61.3308	-53.8419	1.33095	0.0940452
3pd4	-6.11813	-48.6848	-43.2235	1.12801	0.0799031
3pd9	-8.49905	-41.124	-36.3478	0.151211	0.0106066
3std	-15.1811	-60.0296	-57.3378	0.262005	0.0183848
4er1	-9.03771	-93.4092	-82.4877	3.96354	0.280014
4er2	-12.7052	-74.8208	-66.703	1.23515	0.0876812
4rsk	-5.90689	-30.604	-25.2809	3.34633	0.236881
4std	-14.1079	-45.3444	-40.6567	0.840392	0.059397
4tim	-2.95213	-32.7736	-21.2088	3.13766	0.222032
4ts1	-6.74195	-35.0136	-28.2134	0.218393	0.0155563
5er1	-8.22022	-72.7044	-64.3326	2.03029	0.143543
5er2	-8.97276	-98.7044	-87.8591	1.04094	0.0735391
5std	-14.336	-50.6872	-46.4185	0.339101	0.0240416
5tmp	-10.202	-101.938	-91.9112	2.91943	0.206475
5yas	-4.45266	-18.5352	-18.9121	0.344463	0.0240416
6rnt	-3.23268	-23.6076	-16.3452	3.93157	0.277893
6std	-11.7999	-51.1608	-44.2394	0.575129	0.0410122
7std	-14.6452	-45.7956	-43.3328	0.0833755	0.00565685
7upj	-11.604	-62.9188	-56.4953	3.03123	0.214253
8a3h	-5.53984	-47.4116	-43.2331	2.55158	0.180312
aExperimental binding free energies was estimated by ΔGexp = -RTlnKbinding.
bPredicted binding free energies using MM/GBSA approach based on minimized structures and dielectric constant of 4.
cPredicted binding free energies using MM/GBSA approach based on 1 ns MD trajectories and dielectric constant of 4.
dStandard deviations of the predicted binding free energies based on 1 ns trajectories (200 snapshorts for each system).
eStandard errors of the predicted binding free energies based on 1 ns trajectories (200 snapshorts for each system).
